1 ***ATP-dependent Clp protease subunit C1, HvClpC1, is a strong***  
2 ***candidate gene for barley variegation mutant *luteostrians* as***  
3 ***revealed by genetic mapping and genomic re-sequencing***

4 Mingjiu Li<sup>a,1</sup>, Ganggang Guo<sup>b</sup>, Hélène Pidon<sup>a</sup>, Michael Melzer<sup>a</sup>, Alberto R. Prina<sup>c</sup>, Thomas  
5 Börner<sup>d</sup> and Nils Stein<sup>a,e,1</sup>

6 <sup>a</sup>Leibniz Institute of Plant Genetics and Crop Plant Research (IPK), 06466 Seeland, Germany

7 <sup>b</sup>Institute of Crop Sciences, Chinese Academy of Agricultural Sciences, 100081 Beijing, China

8 <sup>c</sup>Instituto de Genética “Ewald A. Favret”, CICVyA (Centro de Investigación en Ciencias  
9 Veterinarias y Agronómicas), Instituto Nacional de Tecnología Agropecuaria, Nicolás Repetto  
10 y de los Reseros s/n (1686) Hurlingham, Buenos Aires, Argentina

11 <sup>d</sup>Molecular Genetics, Institute of Biology, Humboldt University, 10115 Berlin, Germany

12 <sup>e</sup>Center for Integrated Breeding Research (CiBreed), Department of Crop Sciences, Georg-  
13 August-University, Göttingen, Germany

14 **Short title: *ClpC1* is a candidate gene for barley *luteostrians***

15 **Key words:** Chloroplast development, leaf variegation, genetic mapping, genomic re-  
16 sequencing, comparative analysis, *luteostrians*, *albostrians*, *HvClpC1*, *Hordeum vulgare*

17 **<sup>1</sup>Corresponding authors:**

18 Mingjiu Li: [li@ipk-gatersleben.de](mailto:li@ipk-gatersleben.de); Nils Stein: [stein@ipk-gatersleben.de](mailto:stein@ipk-gatersleben.de)

19 **Abstract**

20 Implementation of next-generation sequencing in forward genetic screens greatly accelerated  
21 gene discovery in species with larger genomes, including many crop plants. In barley,  
22 extensive mutant collections are available, however, the causative mutations for many of the  
23 genes remains largely unknown. Here we demonstrate how a combination of low-resolution  
24 genetic mapping, whole-genome resequencing and comparative functional analyses provides  
25 a promising path towards candidate identification of genes involved in plastid biology and / or  
26 photosynthesis, even if genes are located in recombination poor regions of the genome. As a  
27 proof of concept, we simulated the prediction of a candidate gene for the recently cloned  
28 variegation mutant *albostrians* (*HvAST* / *HvCMF7*) and adopted the approach for suggesting  
29 *HvClpC1* as candidate gene for the yellow-green variegation mutant *luteostrians*.

## 30 **Author Summary**

31 Forward genetics is an approach of identifying a causal gene for a mutant phenotype and has  
32 proven to be a powerful tool for dissecting the genetic control of biological processes in many  
33 species. A large number of barley mutants was generated in the 1940s to 1970s when mutation  
34 breeding programs flourished. Genetic dissection of the causative mutations responsible for  
35 the phenotype, however, lagged far behind, limited by lack of molecular markers and high-  
36 throughput genotyping platforms. Next-generation sequencing technologies have  
37 revolutionized genomics, facilitating the process of identifying mutations underlying a  
38 phenotype of interest. Multiple mapping-by-sequencing or cloning-by-sequencing strategies  
39 were established towards fast gene discovery. In this study, we used mapping-by-sequencing  
40 to identify candidate genes within coarsely delimited genetic intervals, for two variegation  
41 mutants in barley – *luteostrians* and *albostrians*. After testing the approach using the example  
42 of the previously cloned *albostrians* gene *HvAST*, the gene *HvClpC1* could be delimited as  
43 candidate gene for *luteostrians*. The mapping-by-sequencing strategy implemented here is  
44 generally suited for surveying barley mutant collections for phenotypes affecting fundamental  
45 processes of plant morphology, physiology and development.

## 46 Introduction

47 Barley mutagenesis was intensely studied in the mid twentieth century. These activities  
48 resulted in extensive mutant collections available through genebanks such as NordGen  
49 (<https://www.nordgen.org/>) and IPK (<https://gbis.ipk-gatersleben.de/gbis2i/faces/index.jsf>).  
50 Barley mutants served as valuable resource for dissecting the genetic basis of a wide range  
51 of complex biological processes. Their broad use, however, was impeded until recently by a  
52 lack of genomic resources and tools. This has been changed by the fast development of next-  
53 generation sequencing (NGS) based technologies and strategies for gene cloning. Due to  
54 diminishing sequencing costs, NGS can be applied for sequencing-based genotyping of whole  
55 mapping populations as well as for whole-genome resequencing to accelerate gene discovery  
56 even in large genome crop species (Candela et al., 2015; Jaganathan et al., 2020). Mapping-  
57 by-sequencing strategies initially were not always ready applicable to all species as they could  
58 be limited. For instance, the Mutmap (Abe et al., 2012) and Mutmap+ (Fekih et al., 2013)  
59 approaches, initially applied to rice, require access to a high-quality reference genome for the  
60 genotype used for mutagenesis; the homozygosity mapping approach requires availability of  
61 genotypes with a known pedigree (Singh et al., 2013). Special attention needs to be paid to  
62 experimental design and technical decisions in order to enforce that sequencing data will allow  
63 to map a mutation of interest (Wilson-Sanchez et al., 2019). In barley, *MANY-NODED DWARF*  
64 (*MND*) was cloned by a technique similar to SHOREmap (Schneeberger et al., 2009);  
65 *LAXATUM-a* (*LAX-a*) was isolated by exome-capture sequencing (Mascher et al., 2013) of  
66 several highly informative recombinant pools (Jost et al., 2016). Notably, identification of *MND*  
67 and *LAX-a* was even achieved while relying on a largely unordered draft genome of barley  
68 (International Barley Genome Sequencing Consortium, 2012). Recently, the release and  
69 improvement of a high-quality reference genome of barley (Mascher et al., 2017; Monat et al.,  
70 2019) has greatly facilitated forward genetic screens relying largely on mapping- / cloning-by-  
71 sequencing strategies (Candela et al., 2015) and thus paved the way towards systematic  
72 dissection of the genic factors underlying barley mutant resources.

73 Many mutants of genebank collections are affected by photosynthesis-related defects leading  
74 to aberrant coloration phenotypes. Photosynthesis-related mutants provide a highly valuable  
75 genetic tool for identification of nuclear genes involved in different aspects of chloroplast  
76 development. Among the distinct chlorophyll-deficient phenotypes, leaf variegation is a  
77 common phenomenon that has been observed for many plants in nature (Toshoji et al., 2012).  
78 Investigations with variegated mutants (patched in dicots / striping in monocots) generated  
79 insights into the molecular mechanisms of leaf variegation (Yu et al., 2007). A threshold-  
80 dependent genetic model was proposed as a mechanism underlying *var2* variegation. *Var2*  
81 encodes a chloroplast-localized protein AtFtsH2 which belongs to the *filamentation*  
82 *temperature sensitive* (*FtsH*) *metalloprotease* gene family (Chen et al., 2000; Takechi et al.,  
83 2000). In the model, two pairs of FtsH proteins, AtFtsH1/5 and AtFtsH2/8, form oligomeric  
84 complexes in the thylakoid membrane and a threshold level of oligomeric complexes is  
85 required for normal chloroplast function and green sector formation (Yu et al., 2004). In  
86 monocot species, *iojap* of maize (*Zea mays*) (Walbot and Coe, 1979) and *albostrians* of barley  
87 (Hagemann and Scholz, 1962; Hess et al., 1993) represent two examples of classical  
88 variegation mutation revealing that cells of albino sectors contain ribosome-free plastids. *iojap*  
89 encodes a component associated with the plastid ribosomal 50S subunit (Han et al., 1992).  
90 The *albostrians* gene *HvAST / HvCMF7* encodes a plastid-localized CCT MOTIF FAMILY  
91 (CMF) protein (Li et al., 2019c). Although a threshold-dependent mechanism is also very likely,  
92 the molecular mechanisms underlying the *iojap* and *albostrians* leaf variegation still remain

93 elusive. *luteostrians* is another barley mutant with a block in early chloroplast development,  
94 showing a yellow-green striped variegation phenotype that appears only if the mutant allele is  
95 inherited through the female gamete.

96 Here we report *HvClpC1* as a candidate gene for the variegation mutant *luteostrians* by  
97 applying a sequencing-based gene identification strategy that has great potential of  
98 systematical application to reveal causative mutations for photosynthesis-related mutants in  
99 barley collections.

## 100 Results

### 101 Inheritance of Leaf Variegation in the *luteostrians* Mutant

102 Phenotypically, progeny of *luteostrians* can be classified into three categories: 1) green-yellow  
103 striped, 2) completely yellow, and 3) albino (Figure 1A). The green-yellow striped seedlings  
104 were able to complete the life cycle while the yellow and albino plants do not survive beyond  
105 the three-leaf vegetative growth stage. Considering the variegated pattern to be analogous to  
106 the *albostrians* mutant of barley (Li et al., 2019c), we named the causal gene underlying the  
107 *luteostrians* striped phenotype as *HvLST*, representing *Hordeum vulgare* LUTEOSTRIANS.  
108 Selfing of heterozygous plants leads to about a quarter of aborted grains, indicating that  
109 homozygosity for the gene (*lst/lst*) is lethal at post-zygote or early embryonic stage (Table 1).  
110 Inheritance of the yellow striped phenotype was gamete-dependent (Figure 1B) since  
111 variegation is observed if the *lst* allele is inherited through the female gamete (i.e., *lst/LST*).  
112 This interpretation is supported by three lines of evidence: 1) when wild type (*LST/LST*) plants  
113 are fertilized with pollen from striped (*lst/LST*) or green heterozygous plants (*LST/lst*), in either  
114 case, only half of the F1 plants offspring showed phenotypic segregation in F2 generation; 2)  
115 a segregation ratio of 2:1 (green:striped) was observed in segregant offspring in F2 generation;  
116 and 3) heterozygous F2 plants (*LST/lst* or *lst/LST*) segregated with green (*LST/LST* or *LST/lst*)  
117 and striped (*lst/LST*) progenies with a ratio of 2:1 in subsequent F3 generation (Figure 1B).  
118 Thus, in addition to its essential function during embryogenesis, we postulate that *HvLST* plays  
119 an essential role in plastid differentiation / programming during gametic stage in the egg cell.

### 120 Chloroplast Translation is Abolished in the *luteostrians* Mutant

121 Defective chloroplasts do not contain 70S ribosomes in the *albostrians* mutant (Hess et al.,  
122 1993; Li et al., 2019c). In an attempt to check the function of the translation machinery in  
123 plastids of the *luteostrians* mutant, we initially examined accumulation of the rRNAs in wild  
124 type and *luteostrians* mutant. In analogy to the *albostrians* mutant, the 16S and 23S rRNA  
125 species are not observed in defective plastids of the *luteostrians* mutant (Figure 2), indicating  
126 the lack of 70S ribosomes and consequently missing chloroplast translation in plastids of the  
127 yellow leaf sectors. Next, we studied chloroplast/plastid ultrastructure by transmission electron  
128 microscopy. These analyses revealed normal chloroplast development in wild type and in  
129 green leaf sections of the *luteostrians* mutant; in both cases chloroplasts contained well-  
130 developed stroma and grana thylakoids (Figure 3A & 3B). In contrast, plastids in yellow sectors  
131 of the variegated *luteostrians* leaves contained no grana and only rudimentary stroma lamellae  
132 (Figure 3C). Notably, chloroplast 70S ribosomes were not detectable in yellow plastids of the  
133 *luteostrians* mutant (Figure 3). Altogether, based on the absence of chloroplast rRNA species  
134 and the lack of 70S ribosomes it can be postulated that chloroplast translation is abolished in  
135 the *luteostrians* mutant.

### 136 Genetic Mapping of *HvLST* to the Genetic Centromere of Chromosome 2H

137 Two F2 mapping populations, designated as 'BL' and 'ML', were constructed for the purpose  
138 of genetic mapping of the *HvLST* gene. The genotypic status of the *luteostrians* locus of F2  
139 plants was determined by phenotypic segregation analysis of their respective F3 progenies.  
140 As homozygosity (*lst/lst*) leads to grain abortion, the BL population contained 95 wild type  
141 (*LST/LST*) and 172 heterozygotes (*LST/lst* and *lst/LST*), consistent with the segregation of a  
142 single recessive gene (Table 2). Genetic mapping in the ML population was affected by  
143 segregation distortion with genotype ratios deviating from the expected Mendelian ratios  
144 (Table 2). Genotyping-by-sequencing was performed for 267 and 269 F2 genotypes in BL and  
145 ML populations, respectively. Sequencing data was mapped to the reference genome of barley  
146 (Monat et al., 2019) for SNP calling. In total, 3,745 and 5,507 SNP markers were obtained  
147 genome-wide at a minimum sequencing coverage of six-fold for BL and ML populations,  
148 respectively. By applying a permissive threshold of 5% missing data for both molecular marker  
149 and F2 genotype, mapping could be performed in 124 F2 / 3369 SNPs and 146 F2 / 4854  
150 SNPs for the BL and ML populations, respectively (Supplemental Table 1). Genetic maps for  
151 seven linkage groups, representing the seven barley chromosomes, were obtained for BL  
152 (LOD  $\geq$  6) and ML (LOD = 10) populations, comprising mapped markers for 66.4% (2238/3369)  
153 and 71.5% (3469/4854) of the originally defined SNPs, respectively (Supplemental Table 1).  
154 The accuracy of the linkage maps was consistency-checked by aligning genetic marker  
155 positions with their respective physical order in the reference genome of barley (Monat et al.,  
156 2019). The *HvLST* gene was assigned to the region of the genetic centromere region of  
157 chromosome 2H with a physical distance between the flanking markers of 461.7 and 499.9  
158 Mbp in BL and ML populations, respectively (Supplemental Figure 1).

159 Next, PCR-based KASP (Kompetitive Allele-Specific PCR) markers were designed and  
160 employed to saturate the identified *HvLST* intervals in both mapping populations. Initially,  
161 genotyping all the 267 (BL population) and 269 (ML population) F2 individuals with two  
162 population-specific KASP markers (chr2H\_178489464 and chr2H\_461744325 for BL  
163 population; chr2H\_200083049 and chr2H\_463274491 for ML population) allowed to confirm  
164 and further narrow down the *HvLST* target region. Notably, the numerical value within each  
165 marker designation indicates the physical coordinate of the mapped SNP position on the  
166 reference genome of barley (Monat et al., 2019) (Figure 4). Subsequently, saturation mapping  
167 of the *HvLST* interval was performed in a total of 18 recombinants (13 in BL / 5 in ML) with  
168 additional KASP markers that were suitable for both mapping populations (Supplemental Table  
169 2). Finally, we delimited the *HvLST* target region to a 0.74 centiMorgan (cM) interval between  
170 flanking markers chr2H\_431057673 and chr2H\_458001177, spanning a distance of ~26.94  
171 Mbp (Figure 5 and Supplemental Table 2). A cluster of markers co-segregated with the *HvLST*  
172 locus, suggesting that maximum genetic resolution was achieved at the given size of both  
173 mapping populations (Figure 4).

#### 174 **Whole Genome Re-sequencing Identifies *HvClpC1* as *HvLST* Candidate Gene**

175 Based on the annotated reference genome sequence of barley (Monat et al., 2019) the genetic  
176 interval of *HvLST* delimited by the closest flanking molecular markers is annotated with 284  
177 genes (Figure 5A and 5C), a number too large for realistically spotting directly a candidate  
178 gene for *HvLST*. One option, higher resolution genetic mapping of the gene *HvLST* by  
179 screening for recombinants in a much larger mapping population was rejected due to the  
180 unfavorable genetic placement of the gene in a region of very low recombination. Instead, we  
181 evaluated the possibility to survey directly for mutations in any of the predicted genes in the  
182 *HvLST* interval by high-throughput re-sequencing.

183 First, we simulated the feasibility of the approach based on existing data for the variegation  
184 mutant *albostrians* (Li et al., 2019c). Previously, low-resolution mapping with 91 F2 genotypes  
185 delimited the gene *HvCMF7* to a 6.05 cM genetic interval between flanking markers Zip\_2613  
186 and 1\_0169. Anchoring the flanking markers to the barley reference genome (Monat et al.  
187 2019) revealed a 17.86 Mbp physical interval comprising 323 genes (Figure 5A-B); comparable  
188 to the situation for *HvLST*. Next, we used whole genome re-sequencing data for the mutant  
189 M4205 (original *albostrians* mutant) and barley cv. Haisa (genetic background used for  
190 induction of the *albostrians* mutant). In an initial screen we filtered M4205-specific SNPs in  
191 genic regions revealing nine candidate genes. The second step of filtering for functional SNPs  
192 (e.g., leading to non-synonymous exchange of amino acid, change of splice junction, or  
193 premature stop) retrieved four candidate genes (Figure 5A-B; Table 3 and Supplemental Table  
194 3). Based on functional annotation of these four genes, a single gene,  
195 *HORVU.MOREX.r2.7HG0603920.1*, homolog to the Arabidopsis gene *CIA2*, was suggested  
196 as the most promising *albostrians* candidate, supported by photosynthesis-related pale green  
197 phenotype of the Arabidopsis *cia2* mutant (Sun et al., 2001).  
198 *HORVU.MOREX.r2.7HG0603920.1* in fact represents the genuine *albostrians* gene, as was  
199 verified by independent mutant analysis (Li et al., 2019c). In conclusion, based on a delimited  
200 genetic interval, survey sequencing of wild type and mutant genetic background may provide  
201 a direct path for candidate gene identification for photosynthesis related phenotype mutants in  
202 barley.

203 We adopted this approach to identify a *HvLST* candidate gene. A wild type (line luteostrians-  
204 2\_2, *LST/LST*) and a mutant genotype (line luteostrians-3\_6, *lst/LST*) were selected from the  
205 originally segregating *luteostrians* mutant, to ensure both analyzed genotypes sharing the  
206 same genetic background of line MC20. In contrast to the previously described simulation for  
207 the gene *albostrians*, the initial screening exercise for sequence polymorphisms between  
208 mutant and wild type had to consider the fact that homozygous *lst/lst* is embryo lethal, hence  
209 functional polymorphisms were expected to be present at heterozygous state. Consequently,  
210 54 out of the 284 genes, identified for the *luteostrians* mapping interval, carried heterozygous  
211 SNPs specific to the *luteostrians* mutant. For a shortlist of eleven genes, the observed SNP  
212 was predicted to induce a putative functional change (Figure 5A and 5C; Table 3 and  
213 Supplemental Table 3). BLASTp search (Mount, 2007) against the Arabidopsis proteome  
214 revealed presence of orthologs for 8 of the 11 candidate genes. None of the remaining three  
215 genes likely represented a genuine *HvLST* candidate as they either encoded for a putative  
216 retrotransposon protein in barley or showed similarity to an organelle gene lacking essential  
217 function in chloroplast biogenesis in Arabidopsis (Table 3 and Supplemental Table 3). We then  
218 inspected functional annotation information and, if available, phenotype information for  
219 mutants of the narrowed shortlist of eight Arabidopsis genes. One of these genes *AT5G50920*  
220 encodes an ATP-dependent Clp protease ATP-binding subunit *ClpC1*. Mutants of this gene  
221 exhibited a pale-yellow phenotype with reduced photosynthetic performance (Sjogren et al.,  
222 2004). Notably, inactivation of the *ClpP* genes (e.g., *ClpP4*, *ClpP5*, *ClpP6*) in Arabidopsis  
223 resulted in embryo lethality and antisense repression lines exhibited a variegated 'yellow-heart'  
224 phenotype (Clarke et al., 2005). In conclusion, *HORVU.MOREX.r2.2HG0135340.1* (*HvClpC1*),  
225 homolog (putative ortholog) of Arabidopsis *ClpC1*, represented the most likely candidate for  
226 the gene *luteostrians*. The predicted heterozygous SNP in *HvClpC1* was confirmed by Sanger  
227 sequencing (Supplemental Table 4). The *luteostrians* mutant carries a heterozygous SNP at  
228 position 2,078 (i.e., G2078A; coordinate refers to the coding sequence), consequently,  
229 changing glycine into aspartic acid at position 693 (i.e., G693D) (Figure 6B).

230 The *HvLST* candidate *HvClpC1* has two close homologs in barley,  
231 *HORVU.MOREX.r2.5HG0373350.1* (homolog 1) and *HORVU.MOREX.r2.4HG0286520.1*  
232 (homolog 2), which share 85.57% and 74.26% amino acid identity with *HvClpC1*, respectively.  
233 All three homologs share the same gene structure with nine exons. In line with the chloroplast  
234 localization of *ClpC1* in Arabidopsis (Sjogren et al., 2014), ChloroP predicts presence of a  
235 chloroplast transit peptide for all three homologs in barley (Figure 6A), potentially suggesting  
236 a chloroplast localization.

237 We looked up the expression profile of *HvClpC1* and its two close homologs in BARLEX  
238 database (Colmsee et al., 2015). *HvClpC1* shows ubiquitous expression in all examined  
239 tissues except young developing inflorescences (INF1) (Figure 6C). The expression pattern of  
240 homolog 1 resembles that of *HvClpC1* but in most tissues at a distinctly lower level. In contrast,  
241 expression of homolog 2 is barely detectable across all the samples.

## 242 Discussion

243 Induced mutants are important tools for elucidating basic principles in the biology of  
244 photosynthesis and organellogenesis in plants. Recently, we reported the cloning and  
245 characterization of the gene which bears a mutation in the well-known green-white striped  
246 mutant *albostrians* of barley (Li et al., 2019c). Here we introduce, based on low-resolution  
247 mapping, whole genome re-sequencing and homology search to photosynthesis or chloroplast  
248 related mutants in Arabidopsis, a highly promising candidate gene *HvClpC1* for the related  
249 yellow-green variegation mutant *luteostrians*.

## 250 Protease ATP-binding Subunit *HvClpC1* Represents the Perfect Candidate Gene for 251 *HvLST*

252 Low-resolution mapping delimited *HvLST* to a large interval spanning a physical distance of  
253 26.9 Mbp comprising a total of 284 genes. By comparative whole genome re-sequencing of  
254 wild type and mutant lines, a homolog of the Arabidopsis gene *AT5G50920* was identified as  
255 candidate *LUTEOSTRIANS* gene. *AT5G50920* belongs to the ATP-dependent protease family  
256 and encodes the ATP-binding subunit *ClpC1*. The *clpC1* null mutant exhibited a homogenous  
257 pale-yellow phenotype (Sjogren et al., 2004). The distinct phenotypes of *ClpC1* knockout lines  
258 in Arabidopsis and *luteostrians* barley are reminiscent of the recently reported orthologous pair  
259 of genes of the variegated *albostrians* barley mutant and its Arabidopsis homolog pale green  
260 mutant *cia2* (Sun et al., 2001; Li et al., 2019c).

261 The CLP protease system is a central component of the chloroplast protease network (Olinares  
262 et al., 2011). It plays essential roles in coordinating plastid proteome dynamics during  
263 developmental transitions such as embryogenesis and leaf development (Nishimura and van  
264 Wijk, 2015). Genetic studies demonstrated that members of the CLP protease family contribute  
265 to chloroplast biogenesis (Constan et al., 2004; Sjogren et al., 2004) and embryogenesis  
266 (Kovacheva et al., 2007; Kim et al., 2009). *ClpC1* plays important roles on chlorophyll  
267 biosynthesis as it controls turnover of glutamyl-tRNA reductase (GluTR) and chlorophyllide a  
268 oxygenase (CAO); GluTR and CAO catalyse an early step of the tetrapyrrole biosynthesis  
269 pathway and the conversion of chlorophyllide a to b, respectively (Nakagawara et al., 2007;  
270 Apitz et al., 2016; Rodriguez-Concepcion et al., 2019). Although single mutants were viable,  
271 siliques of the double mutant *clpC1clpC2* (previously described as *hsp93-V / hsp93-III-2*)  
272 contained aborted seeds (because of a block in the zygote-embryo transition) and failed ovules  
273 (because of a moderate defect in female gametophytes) (Kovacheva et al., 2007). This  
274 suggested that both homologs *ClpC1* and *ClpC2* confer important functions to cell viability



275 during gamete stage and early zygotic stage during embryogenesis. Moreover, the proteome  
276 phenotype of *clpC1clpS1* suggested a ClpS1 and ClpC1 interaction effect on plastid gene  
277 expression components and nucleoid interactors, including RNA processing and editing, as  
278 well as 70S ribosome biogenesis (Nishimura et al., 2013). So far, biochemical and genetic  
279 evidences gathered for *Arabidopsis* single and double mutants related to *clpC1* were in line  
280 with the observed yellow-striped, chloroplast ribosome deficient and embryonic lethal  
281 phenotype (at homozygous state) of the *luteostrians* mutant. Mutants of related genes showed  
282 also variegation in *Arabidopsis*, e.g., *Arabidopsis* mutant *yellow variegated 2 (var2)* exhibited  
283 a patched phenotype (Chen et al., 2000). *VAR2* encodes an ATP-dependent metalloprotease  
284 FtsH2. Together with the CLP and the LON family proteases, FtsH2 belongs to the ATP-  
285 dependent protease AAA+ (ATPase associated with various cellular activities) superfamily  
286 (van Wijk, 2015). FtsH2 showed functional redundancy with FtsH8 and a threshold model (i.e.,  
287 level of FtsH protein complexes formed in the thylakoid membrane) was proposed for the  
288 underlying mechanism of *var2* leaf variegation (Aluru et al., 2006). In analogy to the barley  
289 mutant *albostrians* (Li et al., 2019c), green and yellow sectors of *luteostrians* have the same  
290 genotype. Furthermore, no differences could be determined for the chloroplast ultrastructure  
291 and plastid rRNA content between wild-type leaves and green sectors of striped *luteostrians*  
292 leaves. Therefore, variegation of *luteostrians* leaves may be caused by a threshold-dependent  
293 mechanism.

294 Though *HvClpC1* represents the most promising candidate gene for *HvLST*, further  
295 experimental evidence is required to confirm this hypothesis. As previously demonstrated,  
296 reverse genetic approaches like TILLING or site-directed mutagenesis using Cas9 are viable  
297 options in barley to further check the identity of the candidate gene with *LUTEOSTRIANS*  
298 (Gottwald et al., 2009; Lawrenson et al., 2015; Li et al., 2019c).

## 299 **Cloning-by-sequencing in Barley During the Post-NGS Era**

300 In this study, we demonstrated that a combination of low-resolution genetic mapping and  
301 comparative whole-genome skim sequencing analysis of mutant and wild type can serve as  
302 an effective strategy for gene cloning in barley, especially for genes that share a highly  
303 conserved function in plants, including those involved in photosynthesis and chloroplast  
304 differentiation and development. The probability of having available functional characterization  
305 data for such genes in model plants is high and there is increased probability for seeing related  
306 or conserved phenotypic effects in both model and non-model plants. By adopting this strategy,  
307 we pinpointed the *albostrians* gene *HvCMF7* among 323 candidates within a 17.86 Mbp  
308 interval delimited with 91 F2 genotypes, circumventing the time-consuming and laborious fine-  
309 mapping process as performed previously (Li et al., 2019c). Implementation of the pipeline in  
310 case of the gene *luteostrians* suggested *HvClpC1* to be the likely causative gene underlying  
311 the yellow-stripe variegation phenotype. Notably, the cloning strategy is independent of the  
312 effect of genomic location. Compared to the barley genome-wide average ratio of physical to  
313 genetic distance of 4.4 Mb/cM (Kunzel et al., 2000; Mascher et al., 2017), *HvAST* and *HvLST*  
314 are located in genomic regions with either increased (2.95 Mb/cM) or suppressed (36.35  
315 Mb/cM) rates of recombination, respectively. The success of candidate gene identification in  
316 both cases can be attributed to the achieved high-quality and completeness of the reference  
317 genome of barley (Mascher et al., 2017; Monat et al., 2019). Whole genome re-sequencing of  
318 wild type and mutant parental lines revealed four and eleven candidates for *HvAST* and *HvLST*,  
319 respectively. To further narrow down the shortlist to a single candidate gene, it was critical that  
320 functional analyses for the putative *Arabidopsis* homologs were available. In both cases, the

321 best candidate gene showed a chlorophyll-deficient phenotype for mutants of the respective  
322 Arabidopsis homolog.

323 Genetic mapping information is available for 881 barley mutants of the so-called Bowman near-  
324 isogenic lines (NILs) (Druka et al., 2011); among them, 142 mutants with pigmentation  
325 phenotype. Although the original genetic background of the Bowman NILs is represented by  
326 over 300 different barley genotypes, approximately one-half of the mutants (426/881) were  
327 identified in one of eight barley cultivars (i.e., Bonus, Foma, Betzes, Akashinriki, Morex,  
328 Steptoe, Volla and Birgitta) (Druka et al., 2011). Since leveraging of the high-quality barley  
329 reference genome sequence (Mascher et al., 2017; Monat et al., 2019), whole-genome  
330 resequencing of the parental lines would help to filter background mutations and facilitate  
331 candidate gene identification and isolation. Therefore, it is conceivable that gene identification  
332 in barley, given this pilot attempt based on chlorophyll / photosynthesis related mutants,  
333 reached to a point to become even faster and more systematic now.

## 334 **Materials and Methods:**

### 335 **Plant Materials and Growth Conditions**

336 The *luteostrians* mutant was derived from line MC20 [Institute of Genetics 'Ewald A. Favret'  
337 (IGEAF), INTA CICVyA, mutant accession number] by chemical mutagenesis using sodium  
338 azide. MC20 was derived from the spring barley cv. Maltería Heda by gamma ray mutagenesis.  
339 Two mapping populations were constructed. The six-rowed spring barley (*Hordeum vulgare*)  
340 cv. 'Morex' and two-rowed spring barley cv. 'Barke' were used as maternal parent in crossings  
341 with the variegated mutant line either *luteostrians-1* (*Ist/LST*) or *luteostrians-3* (*Ist/LST*),  
342 respectively. The derived F1 progeny were self-pollinated to generate F2 mapping populations  
343 designated as 'ML' (Morex x *luteostrians*) and 'BL' (Barke x *luteostrians*). All the F2 and F3  
344 individuals were grown under the greenhouse condition with a day/night temperature and  
345 photoperiod cycle of 20°C/15°C and 16-h light/8-h darkness, respectively. Supplemental light  
346 (at 300  $\mu\text{mol photons m}^{-2} \text{ s}^{-1}$ ) was used to extend the natural light with incandescent lamps  
347 (SON-T Agro 400, MASSIVEGROW).

348 For ribosomal RNA analysis, wild type (*luteostrians-2*; genotype *LST/LST*) and mutant  
349 (*luteostrians-1*; genotype *Ist/LST*) lines were grown under the greenhouse light condition. For  
350 dark treatment, seeds were germinated within a carton box wrapped with aluminum foil under  
351 the greenhouse condition mentioned above.

### 352 **Phenotyping**

353 The trait 'leaf color' was scored for the F2 mapping populations at first, second and third leaf  
354 seedling stages. The phenotype of the seedlings was classified into two categories: green and  
355 variegated (i.e., green-yellow striped). Green phenotype defined all the three leaves of each  
356 seedling were purely green; and variegated phenotype defined green-white striped pattern can  
357 be observed on all or any of the three leaves. According to inheritance pattern of the causal  
358 gene *luteostrians* (Figure 1B), variegated plants are heterozygous for the mutant allele  
359 (*Ist/LST*). Green plants, however, can be either wild type (*LST/LST*) or heterozygous (*LST/Ist*).  
360 Therefore, the *luteostrians* genotype of all the F2 plants was determined by phenotyping 32  
361 seedlings of each corresponding F3 family. A wild type (*LST/LST*) F2 would produce 100%  
362 green progeny, progeny of heterozygous (*LST/Ist*) F2 green plant would follow a Mendelian  
363 segregation (green:variegated = 2:1).

## 364 **Ribosomal RNA Analysis**

365 Total RNA was extracted using TRIzol reagent (Invitrogen, Braunschweig, Germany) following  
366 manufacturer's instructions. Initially, concentration of the RNA was determined by help of a  
367 Qubit® 2.0 Fluorometer (Life Technologies, Darmstadt, Germany) according to manufacturer's  
368 instructions. RNA samples were further diluted within a quantitative range of 1 - 10 ng/μL. RNA  
369 quality and quantity were then measured using Agilent High Sensitivity RNA ScreenTape  
370 following the manufacturer's manual (Agilent, Santa Clara, USA).

## 371 **Ultrastructural analysis**

372 Primary leaves were collected from 7-day-old seedlings of wild type and variegated mutant  
373 (*luteostrians-1*). Preparation of 1-2 mm<sup>2</sup> leaf cuttings for ultrastructure analysis including  
374 aldehyde/osmium tetroxide fixation, dehydration, resin infiltration and ultramicrotomy were  
375 performed as previously described (Li et al., 2019b).

## 376 **DNA Isolation**

377 Genomic DNA was extracted from primary leaves of 7-day-old seedlings using a GTC-NaCl  
378 method in 96-well plate format. Frozen leaf samples were homogeneously crushed by help of  
379 a Mixer Mill MM400 (Retsch GmbH, Haan, Germany) for 30 s at 30 Hz. Add 600 μL of  
380 preheated (65°C for 1 hour) GTC extraction buffer (1 M guanidine thiocyanate, 2 M NaCl, 30  
381 mM NaCOOH pH = 6.0, 0.2% Tween 20) to the frozen powder and mixed thoroughly for 30 s  
382 at 30 Hz under Mixer Mill MM400. Centrifugation at 2500 x g for 10 min at 4°C after incubation  
383 the samples at 65°C for 1 hour. Transfer 480 μL of supernatant to a 96-well EconoSpin plate  
384 (Epoch Life Science, Texas, USA). Vacuum the EconoSpin plate on the vacuum manifold  
385 (MACHEREY-NAGEL, Dueren, Germany) until no droplet drop down. Wash the DNA samples  
386 twice with 880 μL washing buffer (50 mM NaCl, 10 mM Tris-HCl pH = 8.0, 1 mM EDTA, 70%  
387 ethanol). Place the EconoSpin plate onto a 96-well Microtiter™ microplate (Thermo Fisher  
388 Scientific, Braunschweig, Germany) and centrifugation at 2500 x g for 3 min to remove residual  
389 wash solution. Dissolve DNA with 100 μL preheated (65°C for 1 hour) TElight buffer (0.1 mM  
390 EDTA, 10 mM Tris-HCl pH = 8.0). The isolated DNA were used for downstream analysis or  
391 put at -20°C for long term storage.

## 392 **Genotyping-by-sequencing**

393 For the genetic mapping of *HvLST*, GBS were prepared from genomic DNA extracted as  
394 described previously, digested with *Pst*I and *Msp*I (New England Biolabs, Frankfurt am Main,  
395 Germany) following published procedure (Wendler et al., 2015). DNA samples were pooled  
396 in an equimolar manner per lane and sequenced on Illumina HiSeq2500 for 107 cycles, single  
397 read, using a custom sequencing primer. The GBS reads were aligned to the reference  
398 genome of barley as described by Milner et al. (2019). Reads were trimmed using cutadapt  
399 (Martin, 2011), mapped with BWA-MEM version 0.7.12a (Li and Durbin, 2009) to barley  
400 reference genome (Monat et al., 2019) and the resulting bam files were sorted using Novosort  
401 (Novocraft Technologies Sdn Bhd, Selangor, Malaysia). Variants were called with samtools  
402 version 1.7 and bcftools version 1.6 (Li, 2011) and filtered following the protocol of Milner et al.  
403 (2019) for a minimum depth of sequencing of six to accept a genotype call, a maximum fraction  
404 of heterozygous call of 60% and a maximum fraction of 20% of missing data. In the case of  
405 'BL' population, SNP calls were converted to reflect the polymorphisms between the two  
406 parents, using the calls for barley cv. Barke.

## 407 Genetic Linkage Map Construction

408 Genetic linkage groups were constructed by help of the JoinMap® 4.1 software (Van Ooijen,  
409 2006) following the instruction manual. Homozygous wild type and heterozygous allele calls  
410 were defined as A and H, respectively; missing data was indicated by a dash. A permissive  
411 threshold of 5% missing data for both molecular marker and F2 genotype was applied to the  
412 datasets. Regression mapping algorithm and Kosambi's mapping function were chosen for  
413 building the linkage maps. Markers were grouped into seven groups based on Logarithm of  
414 Odds (LOD  $\geq$  6) groupings. The seven linkage groups were in corresponding to the barley  
415 chromosomes according to the locus coordinates determined during read mapping to the  
416 reference genome of barley (Monat et al., 2019). Visualization of maps derived from JoinMap®  
417 4.1 was achieved by MapChart software (Voorrips, 2002).

## 418 KASP Assay

419 Sequence 50 bp upstream and downstream of the SNP was extracted from the barley  
420 reference genome (Monat et al., 2019). Allele-specific forward primers and one common  
421 reverse primer were designed by help of the free assay design service of 3CR Bioscience  
422 (<https://3crbio.com/free-assay-design/>) (Supplemental Table 4). KASP primer mix was  
423 prepared in a volume of 100  $\mu$ L containing 12  $\mu$ M of each allele-specific forward primer and 30  
424  $\mu$ M common reverse primer. KASP-PCR reactions were performed in a total volume of 5  $\mu$ L  
425 containing 2.5  $\mu$ L 2X PACE-IR™ Genotyping Master Mix (001-0010, 3CR Bioscience, Essex,  
426 UK), 0.07  $\mu$ L KASP primer mix, and 40 ng of template DNA. PCR program was used with a  
427 HydroCycler (LGC, Teddington, UK): initial denaturation at 94°C for 15 min followed by 10  
428 cycles at 94°C for 20 s, at 65 to 57°C (-0.8°C/cycle) for 1 min, and proceeded for 30 cycles at  
429 94°C for 20 s, at 57°C for 1 min, and followed at 30°C for 30 s. In case of the genotyping  
430 clusters not well separated, an additional PCR was performed with 6 cycles at 94°C for 20 s,  
431 at 57°C for 1 min. Pre-read and post-read of the fluorescence signals were performed on ABI  
432 7900HT instrument (Applied Biosystems, Thermo Fisher Scientific).

## 433 Whole-genome Shotgun Sequencing and Data Analysis

434 DNA was isolated according to the protocol of Doyle and Doyle (1990) from leaf samples  
435 collected from one-week-old, greenhouse-grown seedlings of barley cv. Haisa, *albostrians*  
436 mutant M4205, and lines luteostrians-2\_2 and luteostrians-3\_6. For lines luteostrians-2\_2 and  
437 luteostrians-3\_6, DNA was fragmented (200 - 500 bp) with ultrasounds, then 150 bp paired-  
438 end libraries were prepared according to Illumina standard protocol and sequenced with  
439 Illumina Hiseq X Ten. For Haisa and *albostrians* mutant M4205, 350 bp paired-end libraries  
440 were prepared and sequenced according to the protocol as described previously (International  
441 Barley Genome Sequencing Consortium, 2012). Reads mapping and variants calling to the  
442 barley reference genome were performed as above described for GBS data. Notably, re-  
443 sequencing data of barley cv. Barke, maternal parent of the BL mapping population (for  
444 *luteostrians*) and BM mapping population (for *albostrians*) (Li et al., 2019c) was also included  
445 for SNP calling for identification of mutant-specific SNPs. Functional effect of the mutant-  
446 specific SNPs was annotated by help of SNPeff version 4.3 (Cingolani et al., 2012).

## 447 Acknowledgements

448 We gratefully acknowledge Mary Ziems and Heike Harms for their technical support in  
449 maintaining plant material, performing crossings for construction of the mapping populations;  
450 Manuela Kretschmann for assistance in KASP genotyping; Claudia Riemey for help on

451 electron microscopy; Heike Mueller for photography. The work was supported by a fellowship  
452 of the China Agriculture Research System (CARS-05) and the Agricultural Science and  
453 Technology Innovation Program of CAAS to G.G. and by the Deutsche  
454 Forschungsgemeinschaft grant (DFG) 1102/13-1 to N.S.

#### 455 **Author Contributions**

456 M.L. and N.S. conceived the research; A.R.P. performed initial genetic characterization of the  
457 *luteostrians* mutant; M.L., G.G. and M.M. performed experiments; M.L., H.P. and G.G.  
458 analyzed data; M.L. wrote the manuscript with contributions of H.P.; M.L., T.B. and N.S. revised  
459 the manuscript.

#### 460 **Supplemental Data**

461 **Supplemental Figure 1.** Genetic mapping of the *HvLST* gene.

462 **Supplemental Table 1.** Summary of SNP markers derived from genotyping-by-sequencing.

463 **Supplemental Table 2.** Graphical genotype of selected F2 recombinants.

464 **Supplemental Table 3.** Summary of candidate genes for *HvAST* and *HvLST*.

465 **Supplemental Table 4.** Primers used in this study.

466

#### 467 **REFERENCES**

468 **Abe, A., Kosugi, S., Yoshida, K., Natsume, S., Takagi, H., Kanzaki, H., Matsumura, H.,**  
469 **Yoshida, K., Mitsuoka, C., Tamiru, M., Innan, H., Cano, L., Kamoun, S., and**  
470 **Terauchi, R.** (2012). Genome sequencing reveals agronomically important loci in rice  
471 using MutMap. *Nat. Biotechnol.* **30**, 174-178.

472 **Aluru, M.R., Yu, F., Fu, A., and Rodermel, S.** (2006). Arabidopsis variegation mutants: new  
473 insights into chloroplast biogenesis. *J Exp Bot* **57**, 1871-1881.

474 **Apitz, J., Nishimura, K., Schmied, J., Wolf, A., Hedtke, B., van Wijk, K.J., and Grimm, B.**  
475 (2016). Posttranslational Control of ALA Synthesis Includes GluTR Degradation by Clp  
476 Protease and Stabilization by GluTR-Binding Protein. *Plant Physiol.* **170**, 2040-2051.

477 **Benn, G., Wang, C.Q., Hicks, D.R., Stein, J., Guthrie, C., and Dehesh, K.** (2014). A key  
478 general stress response motif is regulated non-uniformly by CAMTA transcription  
479 factors. *Plant J.* **80**, 82-92.

480 **Candela, H., Casanova-Saez, R., and Micol, J.L.** (2015). Getting started in mapping-by-  
481 sequencing. *J. Integr. Plant Biol.* **57**, 606-612.

482 **Chen, M., Choi, Y., Voytas, D.F., and Rodermel, S.** (2000). Mutations in the Arabidopsis  
483 *VAR2* locus cause leaf variegation due to the loss of a chloroplast FtsH protease. *Plant*  
484 *J.* **22**, 303-313.

485 **Cingolani, P., Platts, A., Wang le, L., Coon, M., Nguyen, T., Wang, L., Land, S.J., Lu, X.,**  
486 **and Ruden, D.M.** (2012). A program for annotating and predicting the effects of single  
487 nucleotide polymorphisms, SnpEff: SNPs in the genome of *Drosophila melanogaster*  
488 strain w1118; iso-2; iso-3. *Fly (Austin)* **6**, 80-92.

489 **Clarke, A., Stanne, T., and Sjögren, L.** (2005). The ATP-dependent Clp protease in  
490 chloroplasts of higher plants. *Physiol. Plant.* **123**, 406-412.

491 **Colmsee, C., Beier, S., Himmelbach, A., Schmutzer, T., Stein, N., Scholz, U., and Mascher,**  
492 **M.** (2015). BARLEX - the Barley Draft Genome Explorer. *Mol Plant* **8**, 964-966.

493 **Constan, D., Froehlich, J.E., Rangarajan, S., and Keegstra, K.** (2004). A stromal Hsp100  
494 protein is required for normal chloroplast development and function in Arabidopsis.  
495 *Plant Physiol.* **136**, 3605-3615.

496 **Daniel-Vedele, F., and Caboche, M.** (1993). A tobacco cDNA clone encoding a GATA-1 zinc  
497 finger protein homologous to regulators of nitrogen metabolism in fungi. *Mol. Gen.*  
498 *Genet.* **240**, 365-373.

499 **Doyle, J.J., and Doyle, J.L.** (1990). Isolation of plant DNA from fresh tissue. *Focus* **12**, 13-15.

- 500 **Druka, A., Franckowiak, J., Lundqvist, U., Bonar, N., Alexander, J., Houston, K., Radovic,**  
501 **S., Shahinnia, F., Vendramin, V., Morgante, M., Stein, N., and Waugh, R.** (2011).  
502 Genetic dissection of barley morphology and development. *Plant Physiol.* **155**, 617-  
503 627.
- 504 **Emanuelsson, O., Nielsen, H., and von Heijne, G.** (1999). ChloroP, a neural network-based  
505 method for predicting chloroplast transit peptides and their cleavage sites. *Protein Sci.*  
506 **8**, 978-984.
- 507 **Fekih, R., Takagi, H., Tamiru, M., Abe, A., Natsume, S., Yaegashi, H., Sharma, S., Sharma,**  
508 **S., Kanzaki, H., Matsumura, H., Saitoh, H., Mitsuoka, C., Utsushi, H., Uemura, A.,**  
509 **Kanzaki, E., Kosugi, S., Yoshida, K., Cano, L., Kamoun, S., and Terauchi, R.** (2013).  
510 MutMap+: genetic mapping and mutant identification without crossing in rice. *PLoS*  
511 *One* **8**, e68529.
- 512 **Gottwald, S., Bauer, P., Komatsuda, T., Lundqvist, U., and Stein, N.** (2009). TILLING in  
513 the two-rowed barley cultivar 'Barke' reveals preferred sites of functional diversity in the  
514 gene *HvHox1*. *BMC Res. Notes* **2**, 258.
- 515 **Hagemann, R., and Scholz, F.** (1962). A case of gene induced mutations of the plasmotype  
516 in barley. *Theor Appl Genet* **32**, 50-59.
- 517 **Han, C.D., Coe, E.H., Jr., and Martienssen, R.A.** (1992). Molecular cloning and  
518 characterization of *iojap (ij)*, a pattern striping gene of maize. *EMBO J.* **11**, 4037-4046.
- 519 **Hess, W.R., Prombona, A., Fieder, B., Subramanian, A.R., and Börner, T.** (1993).  
520 Chloroplast *rps15* and the *rpoB/C1/C2* gene cluster are strongly transcribed in  
521 ribosome-deficient plastids: evidence for a functioning non-chloroplast-encoded RNA  
522 polymerase. *EMBO J.* **12**, 563-571.
- 523 **International Barley Genome Sequencing Consortium.** (2012). A physical, genetic and  
524 functional sequence assembly of the barley genome. *Nature* **491**, 711-716.
- 525 **Jaganathan, D., Bohra, A., Thudi, M., and Varshney, R.K.** (2020). Fine mapping and gene  
526 cloning in the post-NGS era: advances and prospects. *Theor Appl Genet* **133**, 1791-  
527 1810.
- 528 **Jost, M., Taketa, S., Mascher, M., Himmelbach, A., Yuo, T., Shahinnia, F., Rutten, T.,**  
529 **Druka, A., Schmutzer, T., Steuernagel, B., Beier, S., Taudien, S., Scholz, U.,**  
530 **Morgante, M., Waugh, R., and Stein, N.** (2016). A Homolog of Blade-On-Petiole 1  
531 and 2 (BOP1/2) Controls Internode Length and Homeotic Changes of the Barley  
532 Inflorescence. *Plant Physiol.* **171**, 1113-1127.
- 533 **Kim, J., Rudella, A., Ramirez Rodriguez, V., Zybailov, B., Olinares, P.D., and van Wijk,**  
534 **K.J.** (2009). Subunits of the plastid ClpPR protease complex have differential  
535 contributions to embryogenesis, plastid biogenesis, and plant development in  
536 *Arabidopsis*. *Plant Cell* **21**, 1669-1692.
- 537 **Kobayashi, M., Okada, K., and Ikeuchi, M.** (2005). A suppressor mutation in the alpha-  
538 phycocyanin gene in the light/glucose-sensitive phenotype of the *psbK*-disruptant of  
539 the cyanobacterium *Synechocystis* sp. PCC 6803. *Plant Cell Physiol.* **46**, 1561-1567.
- 540 **Kovacheva, S., Bedard, J., Wardle, A., Patel, R., and Jarvis, P.** (2007). Further in vivo  
541 studies on the role of the molecular chaperone, Hsp93, in plastid protein import. *Plant*  
542 *J.* **50**, 364-379.
- 543 **Kunzel, G., Korzun, L., and Meister, A.** (2000). Cytologically integrated physical restriction  
544 fragment length polymorphism maps for the barley genome based on translocation  
545 breakpoints. *Genetics* **154**, 397-412.
- 546 **Lawrenson, T., Shorinola, O., Stacey, N., Li, C., Ostergaard, L., Patron, N., Uauy, C., and**  
547 **Harwood, W.** (2015). Induction of targeted, heritable mutations in barley and Brassica  
548 oleracea using RNA-guided Cas9 nuclease. *Genome Biol.* **16**, 258.
- 549 **Li, B., Ferreira, M.A., Huang, M., Camargos, L.F., Yu, X., Teixeira, R.M., Carpinetti, P.A.,**  
550 **Mendes, G.C., Gouveia-Mageste, B.C., Liu, C., Pontes, C.S.L., Brustolini, O.J.B.,**  
551 **Martins, L.G.C., Melo, B.P., Duarte, C.E.M., Shan, L., He, P., and Fontes, E.P.B.**  
552 (2019a). The receptor-like kinase NIK1 targets FLS2/BAK1 immune complex and  
553 inversely modulates antiviral and antibacterial immunity. *Nat Commun* **10**, 4996.

- 554 **Li, H.** (2011). A statistical framework for SNP calling, mutation discovery, association mapping  
555 and population genetical parameter estimation from sequencing data. *Bioinformatics*  
556 **27**, 2987-2993.
- 557 **Li, H., and Durbin, R.** (2009). Fast and accurate short read alignment with Burrows-Wheeler  
558 transform. *Bioinformatics* **25**, 1754-1760.
- 559 **Li, M., Hensel, G., Melzer, M., Junker, A., Tschiersch, H., Arend, D., Kumlehn, J., Börner,  
560 T., and Stein, N.** (2019b). Mutation of the ALBOSTRIANS Ohnologous Gene HvCMF3  
561 Impairs Chloroplast Development and Thylakoid Architecture in Barley due to Reduced  
562 Plastid Translation. *bioRxiv*.
- 563 **Li, M., Hensel, G., Mascher, M., Melzer, M., Budhagatapalli, N., Rutten, T., Himmelbach,  
564 A., Beier, S., Korzun, V., Kumlehn, J., Borner, T., and Stein, N.** (2019c). Leaf  
565 Variegation and Impaired Chloroplast Development Caused by a Truncated CCT  
566 Domain Gene in albobstrians Barley. *Plant Cell* **31**, 1430-1445.
- 567 **Manfield, I.W., Devlin, P.F., Jen, C.H., Westhead, D.R., and Gilmartin, P.M.** (2007).  
568 Conservation, convergence, and divergence of light-responsive, circadian-regulated,  
569 and tissue-specific expression patterns during evolution of the Arabidopsis GATA gene  
570 family. *Plant Physiol.* **143**, 941-958.
- 571 **Martin, M.** (2011). CUTADAPT removes adapter sequences from high-throughput sequencing  
572 reads. *EMBnet.journal* **17**.
- 573 **Mascher, M., Richmond, T.A., Gerhardt, D.J., Himmelbach, A., Clissold, L., Sampath, D.,  
574 Ayling, S., Steuernagel, B., Pfeifer, M., D'Ascenzo, M., Akhunov, E.D., Hedley, P.E.,  
575 Gonzales, A.M., Morrell, P.L., Kilian, B., Blattner, F.R., Scholz, U., Mayer, K.F.,  
576 Flavell, A.J., Muehlbauer, G.J., Waugh, R., Jeddelloh, J.A., and Stein, N.** (2013).  
577 Barley whole exome capture: a tool for genomic research in the genus *Hordeum* and  
578 beyond. *Plant J.* **76**, 494-505.
- 579 **Mascher, M., Gundlach, H., Himmelbach, A., Beier, S., Twardziok, S.O., Wicker, T.,  
580 Radchuk, V., Dockter, C., Hedley, P.E., Russell, J., Bayer, M., Ramsay, L., Liu, H.,  
581 Haberer, G., Zhang, X.Q., Zhang, Q., Barrero, R.A., Li, L., Taudien, S., Groth, M.,  
582 Felder, M., Hastie, A., Simkova, H., Stankova, H., Vrana, J., Chan, S., Munoz-  
583 Amatriain, M., Ounit, R., Wanamaker, S., Bolser, D., Colmsee, C., Schmutzer, T.,  
584 Aliyeva-Schnorr, L., Grasso, S., Tanskanen, J., Chailyan, A., Sampath, D.,  
585 Heavens, D., Clissold, L., Cao, S., Chapman, B., Dai, F., Han, Y., Li, H., Li, X., Lin,  
586 C., McCooke, J.K., Tan, C., Wang, P., Wang, S., Yin, S., Zhou, G., Poland, J.A.,  
587 Bellgard, M.I., Borisjuk, L., Houben, A., Dolezel, J., Ayling, S., Lonardi, S., Kersey,  
588 P., Langridge, P., Muehlbauer, G.J., Clark, M.D., Caccamo, M., Schulman, A.H.,  
589 Mayer, K.F.X., Platzer, M., Close, T.J., Scholz, U., Hansson, M., Zhang, G.,  
590 Braumann, I., Spannagl, M., Li, C., Waugh, R., and Stein, N.** (2017). A chromosome  
591 conformation capture ordered sequence of the barley genome. *Nature* **544**, 427-433.
- 592 **Milner, S.G., Jost, M., Taketa, S., Mazon, E.R., Himmelbach, A., Oppermann, M., Weise,  
593 S., Knupffer, H., Basterrechea, M., Konig, P., Schuler, D., Sharma, R., Pasam, R.K.,  
594 Rutten, T., Guo, G., Xu, D., Zhang, J., Herren, G., Muller, T., Krattinger, S.G., Keller,  
595 B., Jiang, Y., Gonzalez, M.Y., Zhao, Y., Habekuss, A., Farber, S., Ordon, F., Lange,  
596 M., Borner, A., Graner, A., Reif, J.C., Scholz, U., Mascher, M., and Stein, N.** (2019).  
597 Genebank genomics highlights the diversity of a global barley collection. *Nat. Genet.*  
598 **51**, 319-326.
- 599 **Monat, C., Padmarasu, S., Lux, T., Wicker, T., Gundlach, H., Himmelbach, A., Ens, J., Li,  
600 C., Muehlbauer, G.J., Schulman, A.H., Waugh, R., Braumann, I., Pozniak, C.,  
601 Scholz, U., Mayer, K.F.X., Spannagl, M., Stein, N., and Mascher, M.** (2019). TRITEX:  
602 chromosome-scale sequence assembly of Triticeae genomes with open-source tools.  
603 *Genome Biol.* **20**, 284.
- 604 **Mount, D.W.** (2007). Using the Basic Local Alignment Search Tool (BLAST). *CSH Protoc* **2007**,  
605 *pdb top17*.
- 606 **Nakagawara, E., Sakuraba, Y., Yamasato, A., Tanaka, R., and Tanaka, A.** (2007). Clp  
607 protease controls chlorophyll b synthesis by regulating the level of chlorophyllide a  
608 oxygenase. *Plant J.* **49**, 800-809.

- 609 **Nishimura, K., and van Wijk, K.J.** (2015). Organization, function and substrates of the  
610 essential Clp protease system in plastids. *Biochim. Biophys. Acta* **1847**, 915-930.
- 611 **Nishimura, K., Asakura, Y., Friso, G., Kim, J., Oh, S.H., Rutschow, H., Ponnala, L., and**  
612 **van Wijk, K.J.** (2013). ClpS1 Is a Conserved Substrate Selector for the Chloroplast  
613 Clp Protease System in Arabidopsis. *Plant Cell* **25**, 2276-2301.
- 614 **Olinares, P.D., Kim, J., and van Wijk, K.J.** (2011). The Clp protease system; a central  
615 component of the chloroplast protease network. *Biochim. Biophys. Acta* **1807**, 999-  
616 1011.
- 617 **Perea-Resa, C., Hernandez-Verdeja, T., Lopez-Cobollo, R., del Mar Castellano, M., and**  
618 **Salinas, J.** (2012). LSM proteins provide accurate splicing and decay of selected  
619 transcripts to ensure normal Arabidopsis development. *Plant Cell* **24**, 4930-4947.
- 620 **Prigge, M.J., Platre, M., Kadakia, N., Zhang, Y., Greenham, K., Szutu, W., Pandey, B.K.,**  
621 **Bhosale, R.A., Bennett, M.J., Busch, W., and Estelle, M.** (2020). Genetic analysis of  
622 the Arabidopsis TIR1/AFB auxin receptors reveals both overlapping and specialized  
623 functions. *Elife* **9**.
- 624 **Rodriguez-Concepcion, M., D'Andrea, L., and Pulido, P.** (2019). Control of plastidial  
625 metabolism by the Clp protease complex. *J Exp Bot* **70**, 2049-2058.
- 626 **Schneeberger, K., Ossowski, S., Lanz, C., Juul, T., Petersen, A.H., Nielsen, K.L.,**  
627 **Jorgensen, J.E., Weigel, D., and Andersen, S.U.** (2009). SHOREmap: simultaneous  
628 mapping and mutation identification by deep sequencing. *Nat Methods* **6**, 550-551.
- 629 **Singh, R., Low, E.T., Ooi, L.C., Ong-Abdullah, M., Ting, N.C., Nagappan, J., Nookiah, R.,**  
630 **Amiruddin, M.D., Rosli, R., Manaf, M.A., Chan, K.L., Halim, M.A., Azizi, N., Lakey,**  
631 **N., Smith, S.W., Budiman, M.A., Hogan, M., Bacher, B., Van Brunt, A., Wang, C.,**  
632 **Ordway, J.M., Sambanthamurthi, R., and Martienssen, R.A.** (2013). The oil palm  
633 SHELL gene controls oil yield and encodes a homologue of SEEDSTICK. *Nature* **500**,  
634 340-344.
- 635 **Sjogren, L.L., MacDonald, T.M., Sutinen, S., and Clarke, A.K.** (2004). Inactivation of the  
636 *clpC1* gene encoding a chloroplast Hsp100 molecular chaperone causes growth  
637 retardation, leaf chlorosis, lower photosynthetic activity, and a specific reduction in  
638 photosystem content. *Plant Physiol.* **136**, 4114-4126.
- 639 **Sjogren, L.L., Tanabe, N., Lymeropoulos, P., Khan, N.Z., Rodermeil, S.R., Aronsson, H.,**  
640 **and Clarke, A.K.** (2014). Quantitative analysis of the chloroplast molecular chaperone  
641 ClpC/Hsp93 in Arabidopsis reveals new insights into its localization, interaction with the  
642 Clp proteolytic core, and functional importance. *J. Biol. Chem.* **289**, 11318-11330.
- 643 **Sun, C.W., Chen, L.J., Lin, L.C., and Li, H.M.** (2001). Leaf-specific upregulation of chloroplast  
644 translocon genes by a CCT motif-containing protein, CIA2. *Plant Cell* **13**, 2053-2061.
- 645 **Takechi, K., Sodmergen, Murata, M., Motoyoshi, F., and Sakamoto, W.** (2000). The  
646 YELLOW VARIEGATED (*VAR2*) locus encodes a homologue of FtsH, an ATP-  
647 dependent protease in Arabidopsis. *Plant Cell Physiol.* **41**, 1334-1346.
- 648 **Tehseen, M., Cairns, N., Sherson, S., and Cobbett, C.S.** (2010). Metallochaperone-like  
649 genes in Arabidopsis thaliana. *Metallomics* **2**, 556-564.
- 650 **Toshoji, H., Katsumata, T., Takusagawa, M., Yusa, Y., and Sakai, A.** (2012). Effects of  
651 chloroplast dysfunction on mitochondria: white sectors in variegated leaves have higher  
652 mitochondrial DNA levels and lower dark respiration rates than green sectors.  
653 *Protoplasma* **249**, 805-817.
- 654 **Van Ooijen, J.W.** (2006). JoinMap 4, Software for the calculation of genetic linkage maps in  
655 experimental populations. Kyazma BV, Wageningen, Netherlands.
- 656 **van Wijk, K.J.** (2015). Protein maturation and proteolysis in plant plastids, mitochondria, and  
657 peroxisomes. *Annu. Rev. Plant Biol.* **66**, 75-111.
- 658 **Voorrips, R.E.** (2002). MapChart: software for the graphical presentation of linkage maps and  
659 QTLs. *J. Hered.* **93**, 77-78.
- 660 **Walbot, V., and Coe, E.H.** (1979). Nuclear gene *iojap* conditions a programmed change to  
661 ribosome-less plastids in *Zea mays*. *Proc. Natl. Acad. Sci. U. S. A.* **76**, 2760-2764.
- 662 **Ward, J.M., Smith, A.M., Shah, P.K., Galanti, S.E., Yi, H., Demianski, A.J., van der Graaff,**  
663 **E., Keller, B., and Neff, M.M.** (2006). A new role for the Arabidopsis AP2 transcription



- 664 factor, LEAFY PETIOLE, in gibberellin-induced germination is revealed by the  
665 misexpression of a homologous gene, SOB2/DRN-LIKE. *Plant Cell* **18**, 29-39.
- 666 **Wendler, N., Mascher, M., Himmelbach, A., Johnston, P., Pickering, R., and Stein, N.**  
667 (2015). Bulbosum to Go: A Toolbox to Utilize *Hordeum vulgare*/bulbosum  
668 Introgressions for Breeding and Beyond. *Mol Plant* **8**, 1507-1519.
- 669 **Wilson-Sanchez, D., Lup, S.D., Sarmiento-Manus, R., Ponce, M.R., and Micol, J.L.** (2019).  
670 Next-generation forward genetic screens: using simulated data to improve the design  
671 of mapping-by-sequencing experiments in *Arabidopsis*. *Nucleic Acids Res.* **47**, e140.
- 672 **Yang, W., Dong, R., Liu, L., Hu, Z., Li, J., Wang, Y., Ding, X., and Chu, Z.** (2016). A novel  
673 mutant allele of SSI2 confers a better balance between disease resistance and plant  
674 growth inhibition on *Arabidopsis thaliana*. *BMC Plant Biol.* **16**, 208.
- 675 **Yu, F., Park, S., and Rodermeil, S.R.** (2004). The *Arabidopsis* FtsH metalloprotease gene  
676 family: interchangeability of subunits in chloroplast oligomeric complexes. *Plant J.* **37**,  
677 864-876.
- 678 **Yu, F., Fu, A.G., Aluru, M., Park, S., Xu, Y., Liu, H.Y., Liu, X.Y., Foudree, A., Nambogga,**  
679 **M., and Rodermeil, S.** (2007). Variegation mutants and mechanisms of chloroplast  
680 biogenesis. *Plant Cell and Environment* **30**, 350-365.

681

**Table 1. Phenotypic segregation of zygotic lethality in F2 of BL and ML populations**

|               | Number of scored heterozygous F2 plants | viable F3 grains | non-viable F3 grains | $\chi^2_{(df=1)}$ | <i>p</i> value |
|---------------|-----------------------------------------|------------------|----------------------|-------------------|----------------|
| BL population | 39                                      | 609              | 210                  | 0.18              | 0.67*          |
| ML population | 26                                      | 343              | 109                  | 0.19              | 0.66*          |

\* Statistically no significant derivation from the expected 3:1 (fertile:sterile) segregation ratio.

**Table 2. Genotypic segregation of the *HvLST* locus in F2 of BL and ML populations**

|               | Maternal | Paternal                      | Population size | Wild type | Heterozygote | $\chi^2_{(df=1)}$ | <i>p</i> value      |
|---------------|----------|-------------------------------|-----------------|-----------|--------------|-------------------|---------------------|
| BL Population | Barke    | <i>luteostrians (Ist/LST)</i> | 269             | 95        | 172          | 0.61              | 0.44*               |
| ML Population | Morex    | <i>luteostrians (Ist/LST)</i> | 271             | 117       | 152          | 12.47             | 0.0004 <sup>§</sup> |

\* Statistically no significant derivation from the expected 1:2 (wild type:heterozygote) segregation ratio.

<sup>§</sup> Segregation distortion observed for ML population.

**Table 3. Summary of candidate genes for *HvAST* and *HvLST***

| Gene ID*                                                    | Confidence | Annotation                                              | Homolog in Arabidopsis <sup>§</sup>   | Phenotype / Function                                                                                                              | Reference                                                  |
|-------------------------------------------------------------|------------|---------------------------------------------------------|---------------------------------------|-----------------------------------------------------------------------------------------------------------------------------------|------------------------------------------------------------|
| <b>Candidate genes for <i>HvAST</i></b>                     |            |                                                         |                                       |                                                                                                                                   |                                                            |
| <b><i>HORVU.MOREX.r2.7</i></b><br><b><i>HG0603920.1</i></b> | HC         | Zinc finger protein                                     | <i>AT5G57180</i><br>( <i>CIA2</i> )   | <i>cia2</i> mutant exhibits a pale green phenotype                                                                                | (Sun et al., 2001)                                         |
| <i>HORVU.MOREX.r2.7</i><br><i>HG0603970.1</i>               | LC         | Retrotransposon protein, putative, unclassified         | <i>AT1G43760</i>                      | Uncharacterized in Arabidopsis                                                                                                    | n.a                                                        |
| <i>HORVU.MOREX.r2.7</i><br><i>HG0604040.1</i>               | HC         | GATA transcription factor 27                            | <i>AT1G51600</i><br>( <i>ZML2</i> )   | GATA transcription factors are known to be involved in light-dependent gene regulation and nitrate assimilation in plants         | (Manfield et al., 2007); (Daniel-Vedele and Caboche, 1993) |
| <i>HORVU.MOREX.r2.7</i><br><i>HG0604110.1</i>               | HC         | Receptor-like kinase                                    | <i>AT5G16000</i><br>( <i>NIK1</i> )   | Dwarfed morphology, enhanced disease resistance to bacteria and increased PAMP-triggered immunity responses                       | (Li et al., 2019a)                                         |
| <b>Candidate genes for <i>HvLST</i></b>                     |            |                                                         |                                       |                                                                                                                                   |                                                            |
| <i>HORVU.MOREX.r2.2</i><br><i>HG0133160.1</i>               | HC         | Acyl-[acyl-carrier-protein] desaturase                  | <i>AT2G43710</i><br>( <i>SS2</i> )    | Decreased growth and increased disease resistance                                                                                 | (Yang et al., 2016)                                        |
| <i>HORVU.MOREX.r2.2</i><br><i>HG0133350.1</i>               | HC         | Retrotransposon protein, putative, unclassified         | n.a                                   | Absence in Arabidopsis                                                                                                            | n.a                                                        |
| <i>HORVU.MOREX.r2.2</i><br><i>HG0133900.1</i>               | LC         | Retrotransposon protein, putative, Ty3-gypsy subclass   | <i>ATMG00860</i>                      | Mitochondria-specific gene <i>ORF158</i>                                                                                          | n.a                                                        |
| <i>HORVU.MOREX.r2.2</i><br><i>HG0134330.1</i>               | HC         | Calmodulin-binding transcription activator              | <i>AT1G67310</i><br>( <i>CAMTA4</i> ) | Positive regulation of a general stress response                                                                                  | (Benn et al., 2014)                                        |
| <i>HORVU.MOREX.r2.2</i><br><i>HG0134390.1</i>               | HC         | U6 snRNA-associated Sm-like protein LSM6                | <i>AT2G43810</i><br>( <i>LSM6B</i> )  | <i>lsm6b</i> mutant exhibits wild-type phenotype                                                                                  | (Perea-Resa et al., 2012)                                  |
| <i>HORVU.MOREX.r2.2</i><br><i>HG0134800.1</i>               | HC         | Photosystem II reaction center protein K                | <i>ATCG00070</i><br>( <i>psbK</i> )   | Chloroplast-specific <i>psbK</i> gene; <i>psbK</i> is not essential for PSII activity in cyanobacterium <i>Synechocystis</i> 6803 | (Kobayashi et al., 2005)                                   |
| <i>HORVU.MOREX.r2.2</i><br><i>HG0135080.1</i>               | HC         | Transport inhibitor response 1-like protein             | <i>AT3G26810</i><br>( <i>AFB2</i> )   | Resistance to IAA; a role in shoot development                                                                                    | (Prigge et al., 2020)                                      |
| <i>HORVU.MOREX.r2.2</i><br><i>HG0135330.1</i>               | HC         | Heavy-metal-associated domain-containing family protein | <i>AT1G22990</i><br>( <i>HIPP22</i> ) | <i>hipp22</i> mutant exhibits wild-type phenotype; a role in Cd-detoxification                                                    | (Tehseen et al., 2010)                                     |
| <b><i>HORVU.MOREX.r2.2</i></b><br><b><i>HG0135340.1</i></b> | HC         | ATP-dependent Clp protease ATP-binding subunit ClpC1    | <i>AT5G50920</i><br>( <i>ClpC1</i> )  | Retarded growth; leaf chlorosis; lower photosynthetic activity; reduction in photosystem content                                  | (Sjogren et al., 2004)                                     |
| <i>HORVU.MOREX.r2.2</i><br><i>HG0135360.1</i>               | HC         | Protein TSSC4                                           | <i>AT5G13970</i>                      | Uncharacterized in Arabidopsis; <i>TSSC4</i> represents tumor suppressing subtransferable candidate 4 in <i>Homo sapiens</i>      | n.a                                                        |
| <i>HORVU.MOREX.r2.2</i><br><i>HG0135690.1</i>               | HC         | Ethylene-responsive transcription factor, putative      | <i>AT5G13910</i><br>( <i>LEP</i> )    | <i>lep-1</i> mutant exhibits short hypocotyls and small cotyledons                                                                | (Ward et al., 2006)                                        |

\*The gene ID in bold indicates the *HvAST* locus and potential *HvLST* locus.

§The gene ID is included in parentheses.

684 **Figure Legends**

685 **Figure 1. Phenotype and inheritance of variegation in the barley mutant *luteostrians*.**

686 (A) Penetration of the mutant phenotype varies among seedlings, ranging from a narrow yellow  
687 stripe to complete yellowish or albino. Neither yellowish/albino plants survived beyond third-leaf  
688 stage.

689 (B) Inheritance pattern of the *luteostrians* mutant phenotype. Variegation only occurs in plants if  
690 the *Ist* allele was transmitted through the female gamete. Upper panel: Heterozygous plants can  
691 be obtained by using either green or variegated plants (heterozygous for the *luteostrians* allele)  
692 as pollen donor. This will generate 50% F1-progeny heterozygous for *luteostrians* (panel F1).  
693 Progenies of selfed F1 heterozygotes will exhibit Mendelian segregation in F2; the variegated  
694 phenotype, however, will appear only in 50% of the heterozygous plants, carrying the mutant  
695 allele inherited from F1 female gamete. Zygotes homozygous for the *luteostrians* allele will be  
696 aborted as homozygosity of *luteostrians* early zygotic lethal. Lower panel: Green phenotype of  
697 homozygous wild type plants in F2 will be stably transmitted in F3; progenies of heterozygous F2  
698 plants follow a Mendelian inheritance pattern in F3.

699 **Figure 2. rRNA analysis of wild type and *HvIst* mutant.**

700 (A) Separation of cytosolic and plastid rRNAs using the Agilent high sensitivity RNA ScreenTape  
701 assay.

702 (B) Analysis of rRNA from wild type and *HvIst* mutant using Agilent Tapestation 4200. The  
703 respective cytosolic and plastid rRNA species are indicated by arrows.

704 **Figure 3. Ultrastructural analysis of chloroplasts of the wild type and *HvIst* mutant.**

705 (A-C) Ultrastructural analysis of wild type (A), and green (B) and yellow (C) sectors of the *HvIst*  
706 mutant, respectively. Wild type and green leaves of the *HvIst* mutant contain chloroplasts with  
707 fully differentiated grana and stroma thylakoids. By contrast, in plastids of yellow leaves of the  
708 *HvIst* mutant only some pieces of undeveloped membranes were observed.

709 (D-F) Larger magnification of square areas of the corresponding plastid in the top panels A to C.  
710 GA, grana; ST, stroma thylakoid; PL, plastoglobuli.

711 **Figure 4. Saturation mapping of the delineated *HvLST* genetic interval.**

712 (A) Marker saturation around the *HvLST* locus in BL population.

713 (B) Marker saturation around the *HvLST* locus in ML population. Recombination events and  
714 genetic distance (recombinants/cM) between the neighboring markers are shown on the left of  
715 each genetic map. Markers co-segregating with the gene *HvLST* are indicated by a vertical green  
716 line. Red font is highlighting the closest flanking markers.

717 **Figure 5. Workflow of candidate gene identification in barley photosynthetic mutants**  
718 **exemplified for *HvAST* and *HvLST*.**

719 (A) The initial step of the strategy built on low-resolution genetic mapping. Whole genome re-  
720 sequencing data for the mutant and its corresponding wild type genotype was then generated for  
721 mapping and variation calling against the Morex v2 reference sequence (Monat et al., 2019).

722 (B) Candidate gene identification was exemplified on the basis of the previously cloned gene  
723 *albostrians* (*HvAST*). 323 genes were annotated for the physical interval of ~18 Mbp initially  
724 delimited by low-resolution genetic mapping. SNP variation was found in 9 genes, while only 4  
725 genes carried non-synonymous or other deleterious mutations. A single candidate gene (the  
726 confirmed gene *HvAST*) could be delimited based on available functional annotation information  
727 indicating a role in plastid biology / photosynthesis.

728 (C) A similar strategy was applied to the cloning of *luteostrians*. 284 genes were annotated for  
729 the initial genetic interval. Eventually, a single candidate gene with predicted functional annotation  
730 for a role in plastid biology / photosynthesis and non-synonymous / deleterious mutation could be  
731 spotted. HC, high-confidence gene; LC, low-confidence genes. Criteria for classification of HC  
732 and LC refers to Mascher et al. (2017).

733 **Figure 6. Validation of the heterozygous SNP of *HvClpC1* by Sanger sequencing and**  
734 **expression profiles of *HvClpC1* and homologs.**

735 (A) Gene structure of *HvLST* candidate (*HvClpC1*) and its two closest homologs. Black boxes  
736 indicate exons and horizontal lines indicate introns. Green areas indicate chloroplast transit  
737 peptides as predicted by ChloroP (Emanuelsson et al., 1999). The first and second introns of  
738 homolog 1 are not drawn at scale as indicated by the interrupted lines; the actual length is shown  
739 above gaps, respectively. Red filled triangle indicates SNP position of *HvClpC1*.

740 (B) Chromatogram of Sanger sequencing. Red arrow indicates position of the heterozygous SNP  
741 of *HvClpC1* in the original mutant line *luteostrians-1\_1*. Details of the SNP are illustrated in the  
742 table below.

743 (C) Expression profiles of *HvClpC1* and its two closest homologs. The expression levels are given  
744 as fragments per kilobase of exon per million reads mapped (FPKM) across sixteen different  
745 tissues or developmental stages. The data was taken from Mascher et al. (2017). EMB, 4-day  
746 embryos; ROO1, roots from seedlings (10 cm shoot stage); LEA, shoots from seedlings (10 cm  
747 shoot stage); INF1, young developing inflorescences (5 mm); INF2, developing inflorescences (1-  
748 1.5 cm); NOD, developing tillers, 3rd internode (42 DAP); CAR5, developing grain (5 DAP);  
749 CAR15, developing grain (15 DAP); ET1, etiolated seedling, dark condition (10 DAP); LEM,  
750 inflorescences, lemma (42 DAP); LOD, inflorescences, lodicule (42 DAP); PAL, dissected  
751 inflorescences, palea (42 DAP); EPI, epidermal strips (28 DAP); RAC, inflorescences, rachis (35  
752 DAP); ROO2, roots (28 DAP); SEN, senescing leaves (56 DAP).

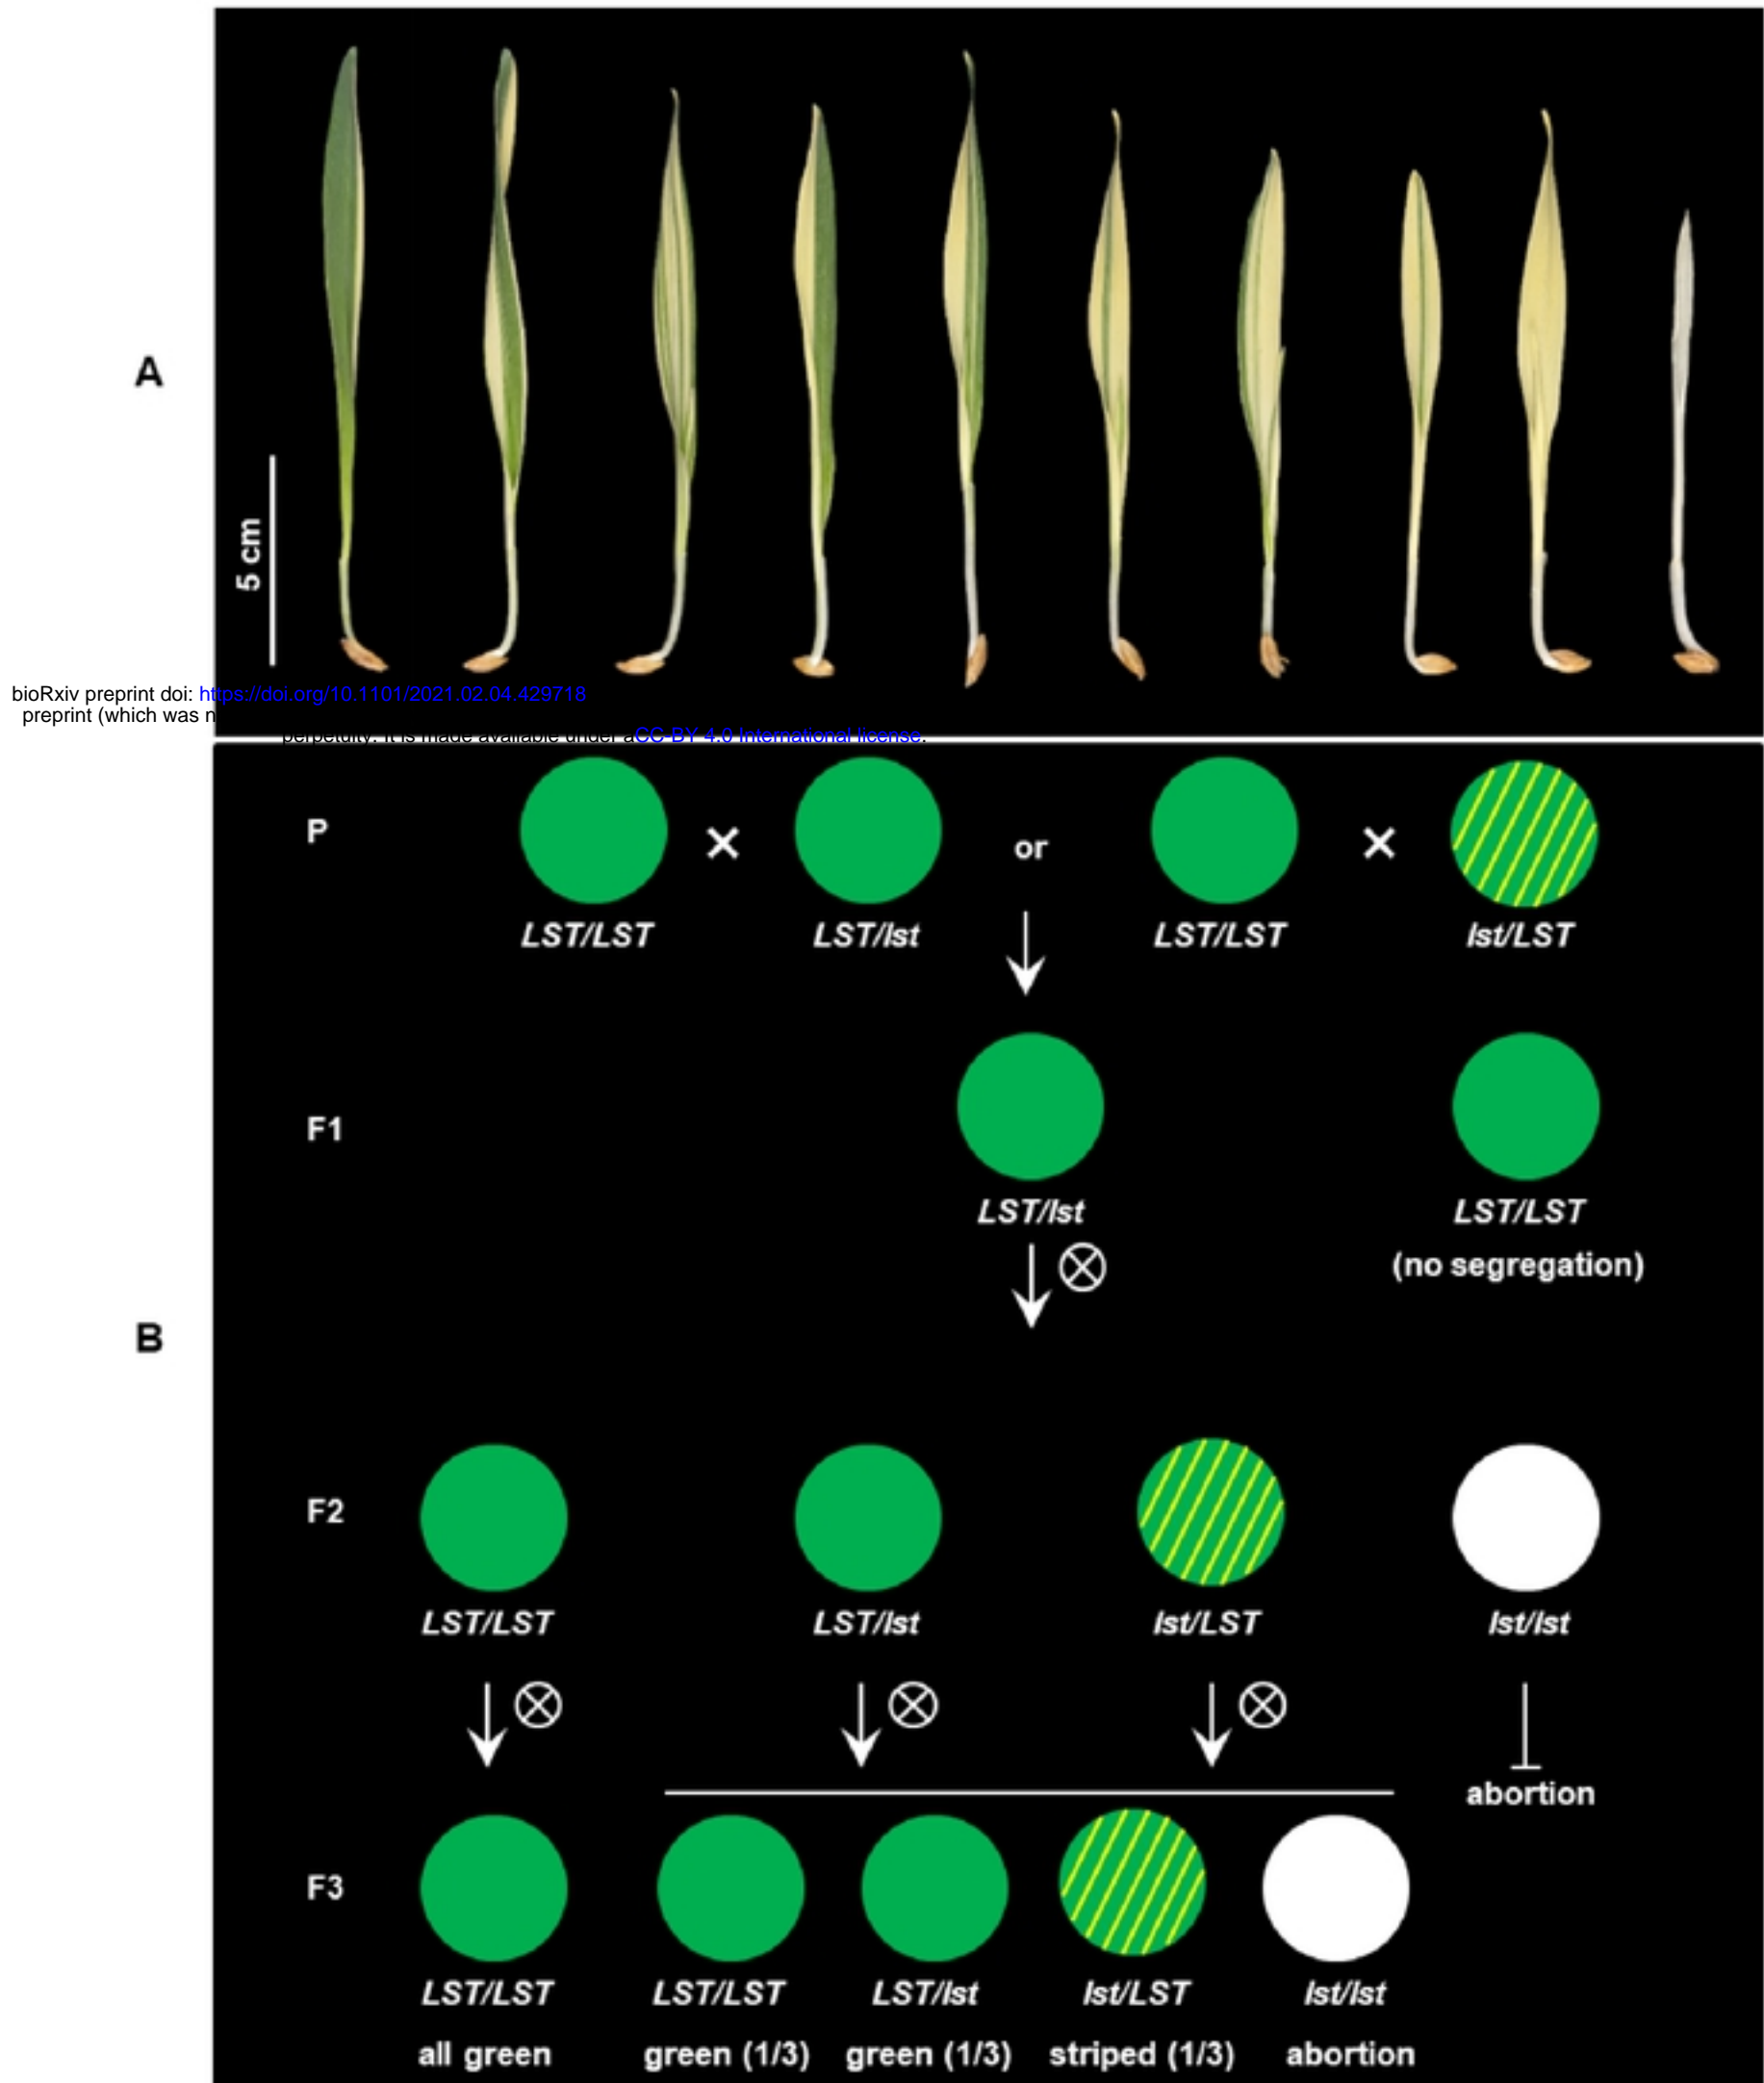

**Figure 1. Phenotype and inheritance of variegation in the barley mutant *luteostrians*.**

(A) Penetration of the mutant phenotype varies among seedlings, ranging from a narrow yellow stripe to complete yellowish or albino. Neither yellowish/albino plants survived beyond third-leaf stage.

(B) Inheritance pattern of the *luteostrians* mutant phenotype. Variegation only occurs in plants if the *lst* allele was transmitted through the female gamete. Upper panel: Heterozygous plants can be obtained by using either green or variegated plants (heterozygous for the *luteostrians* allele) as pollen donor. This will generate 50% F1-progeny heterozygous for *luteostrians* (panel F1). Progenies of selfed F1 heterozygotes will exhibit Mendelian segregation in F2; the

variegated phenotype, however, will appear only in 50% of the heterozygous plants, carrying the mutant allele inherited from F1 female gamete. Zygotes homozygous for the *luteostrians* allele will be aborted as homozygosity of *luteostrians* early zygotic lethal. Lower panel: Green phenotype of homozygous wild type plants in F2 will be stably transmitted in F3; progenies of heterozygous F2 plants follow a Mendelian inheritance pattern in F3.



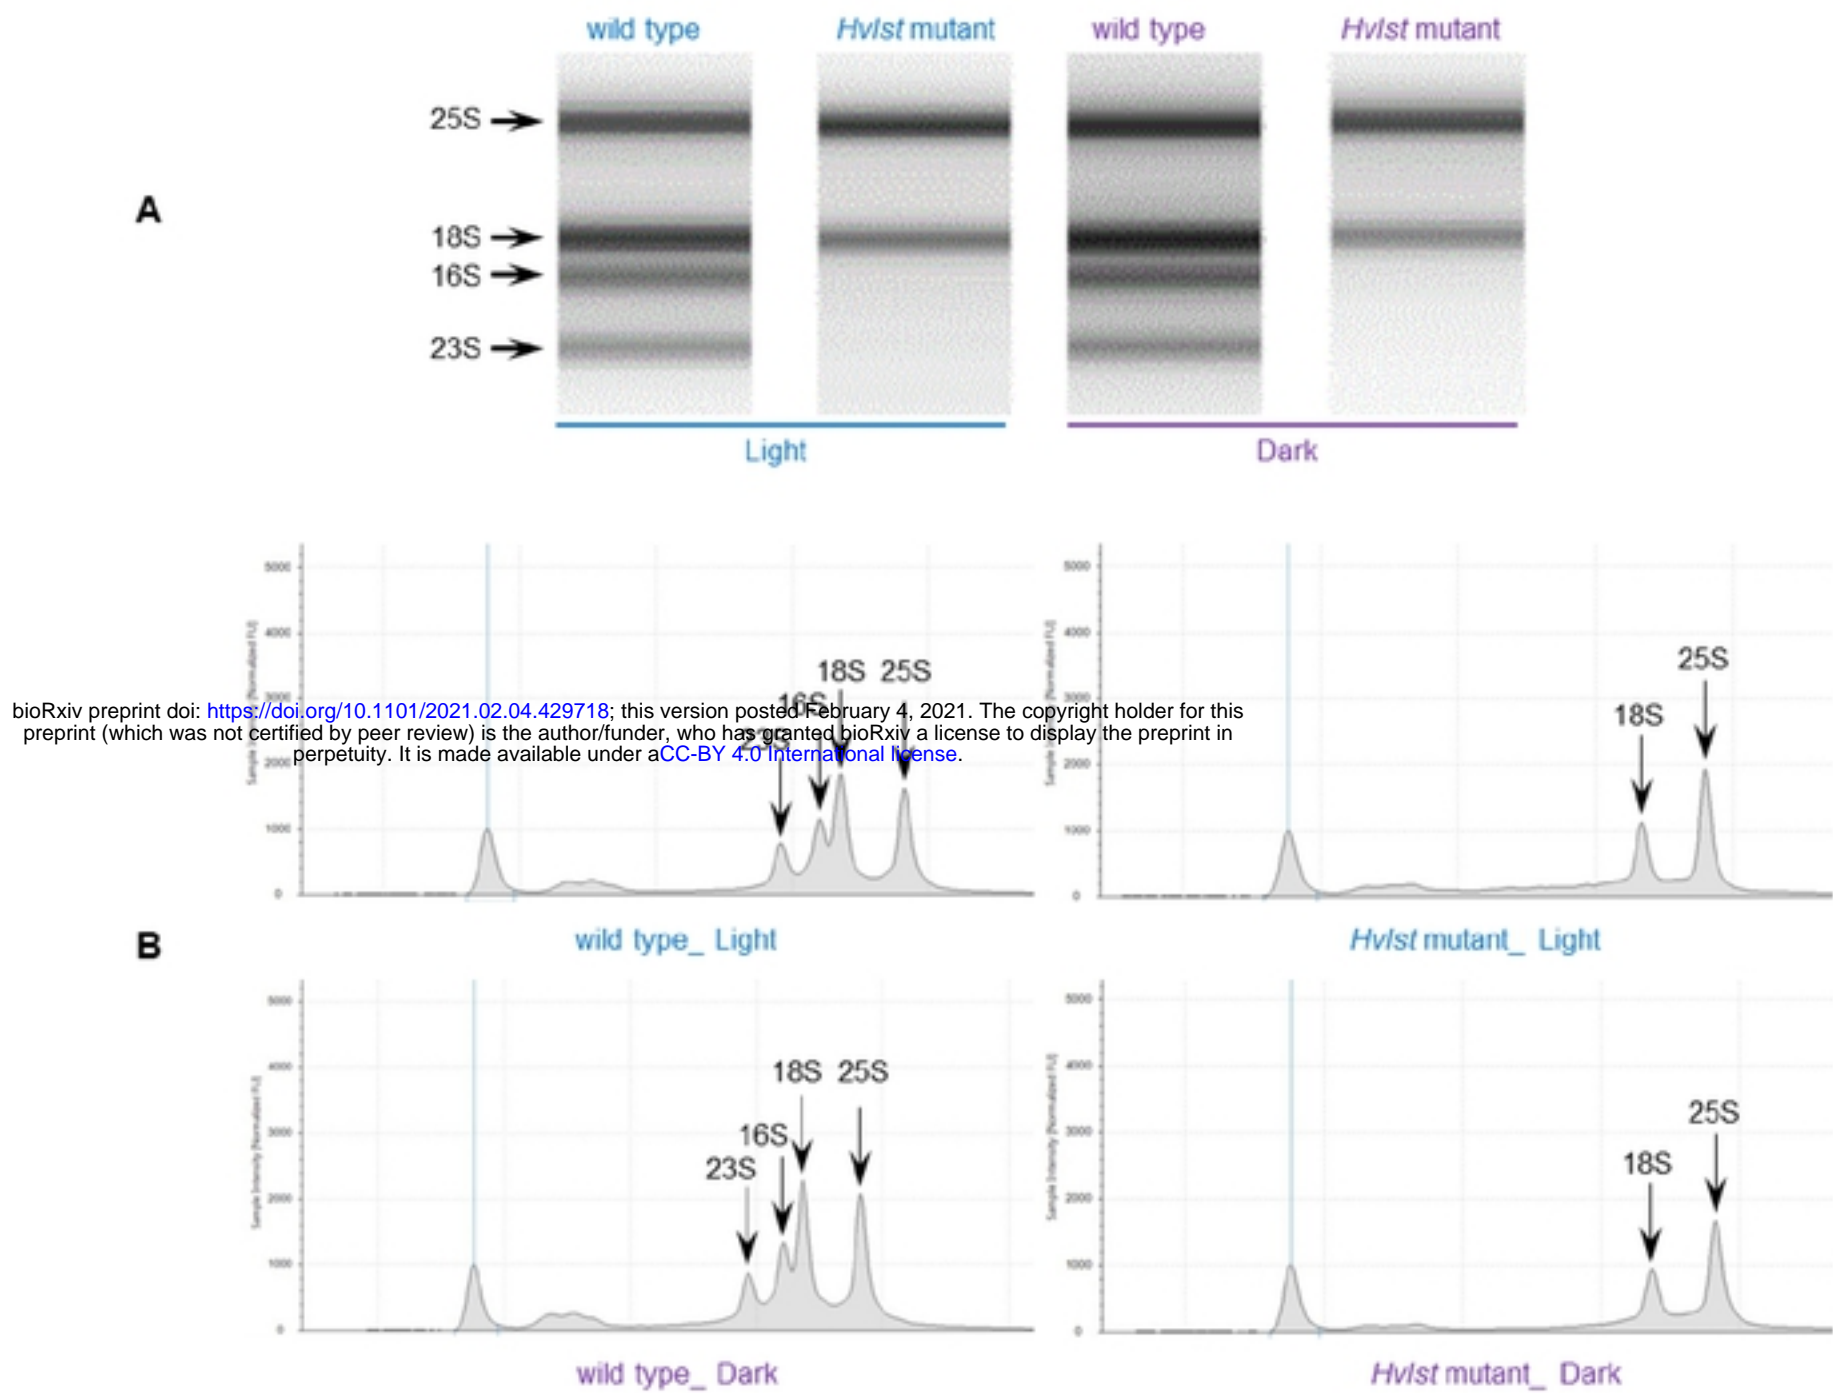

**Figure 2. rRNA analysis of wild type and *Hv1st* mutant.**

(A) Separation of cytosolic and plastid rRNAs using the Agilent high sensitivity RNA ScreenTape assay.

(B) Analysis of rRNA from wild type and *Hv1st* mutant using Agilent TapeStation 4200. The respective cytosolic and plastid rRNA species are indicated by arrows.

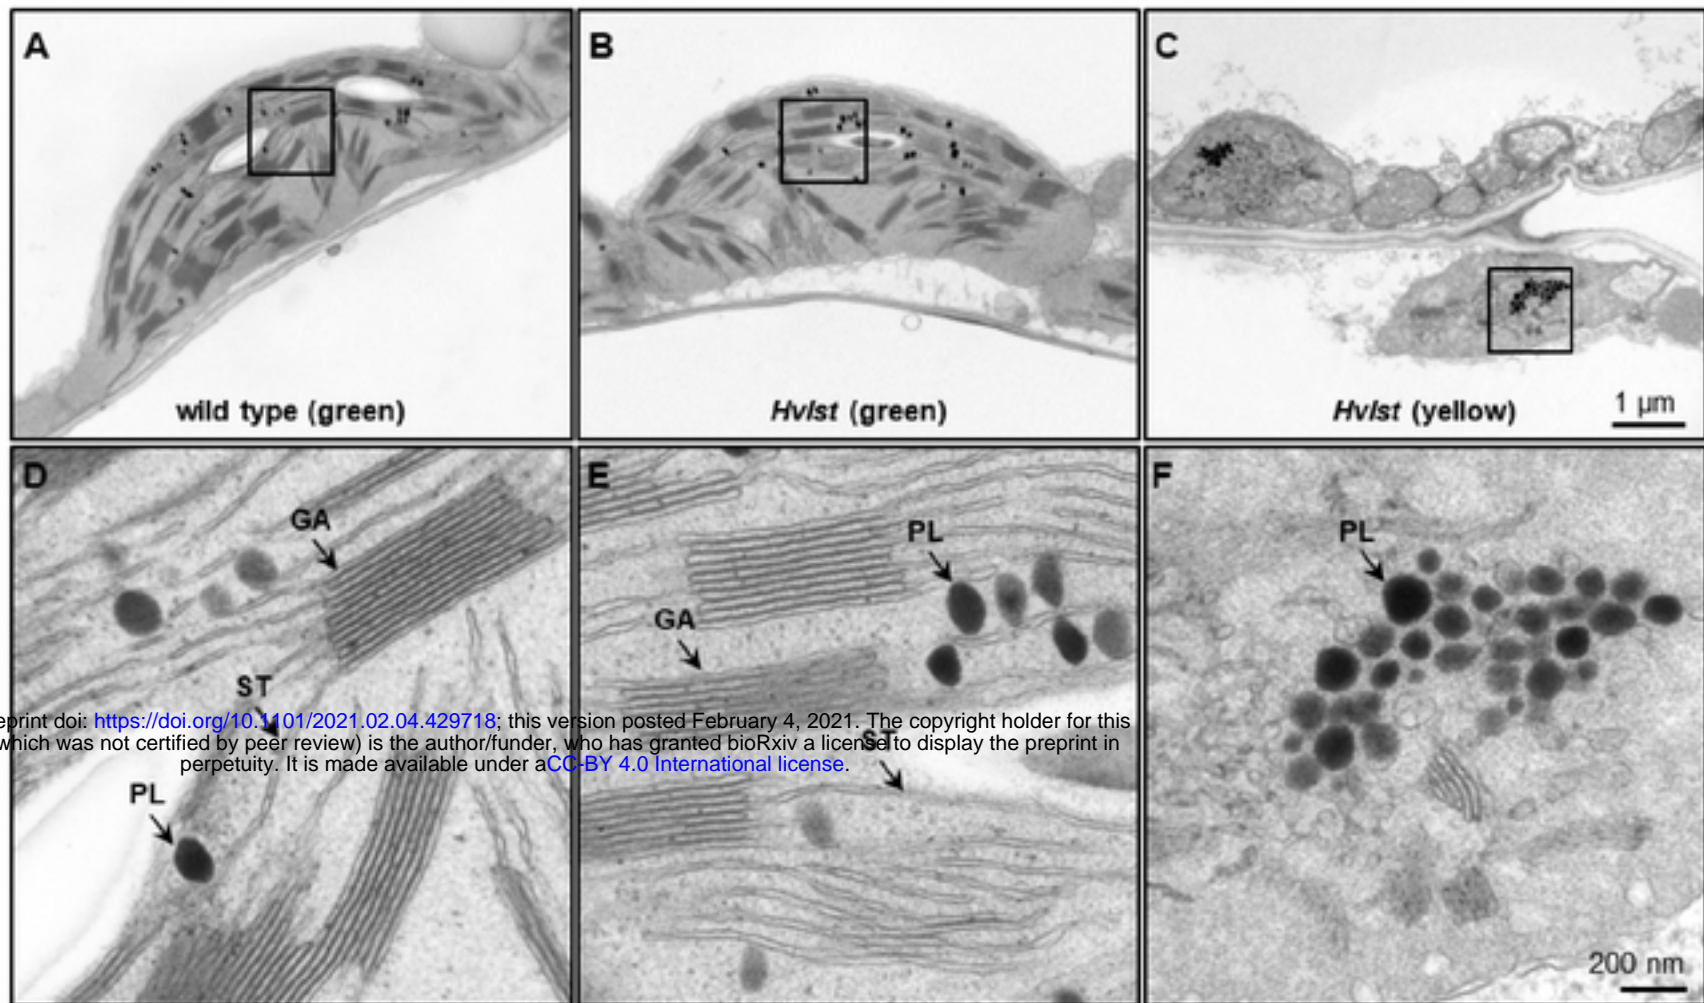

**Figure 3. Ultrastructural analysis of chloroplasts of the wild type and *Hv1st* mutant.**

(A-C) Ultrastructural analysis of wild type (A), and green (B) and yellow (C) sectors of the *Hv1st* mutant, respectively. Wild type and green leaves of the *Hv1st* mutant contain chloroplasts with fully differentiated grana and stroma thylakoids. By contrast, in plastids of yellow leaves of the *Hv1st* mutant only some pieces of undeveloped membranes were observed.

(D-F) Larger magnification of square areas of the corresponding plastid in the top panels A to C. GA, grana; ST, stroma thylakoid; PL, plastoglobuli.

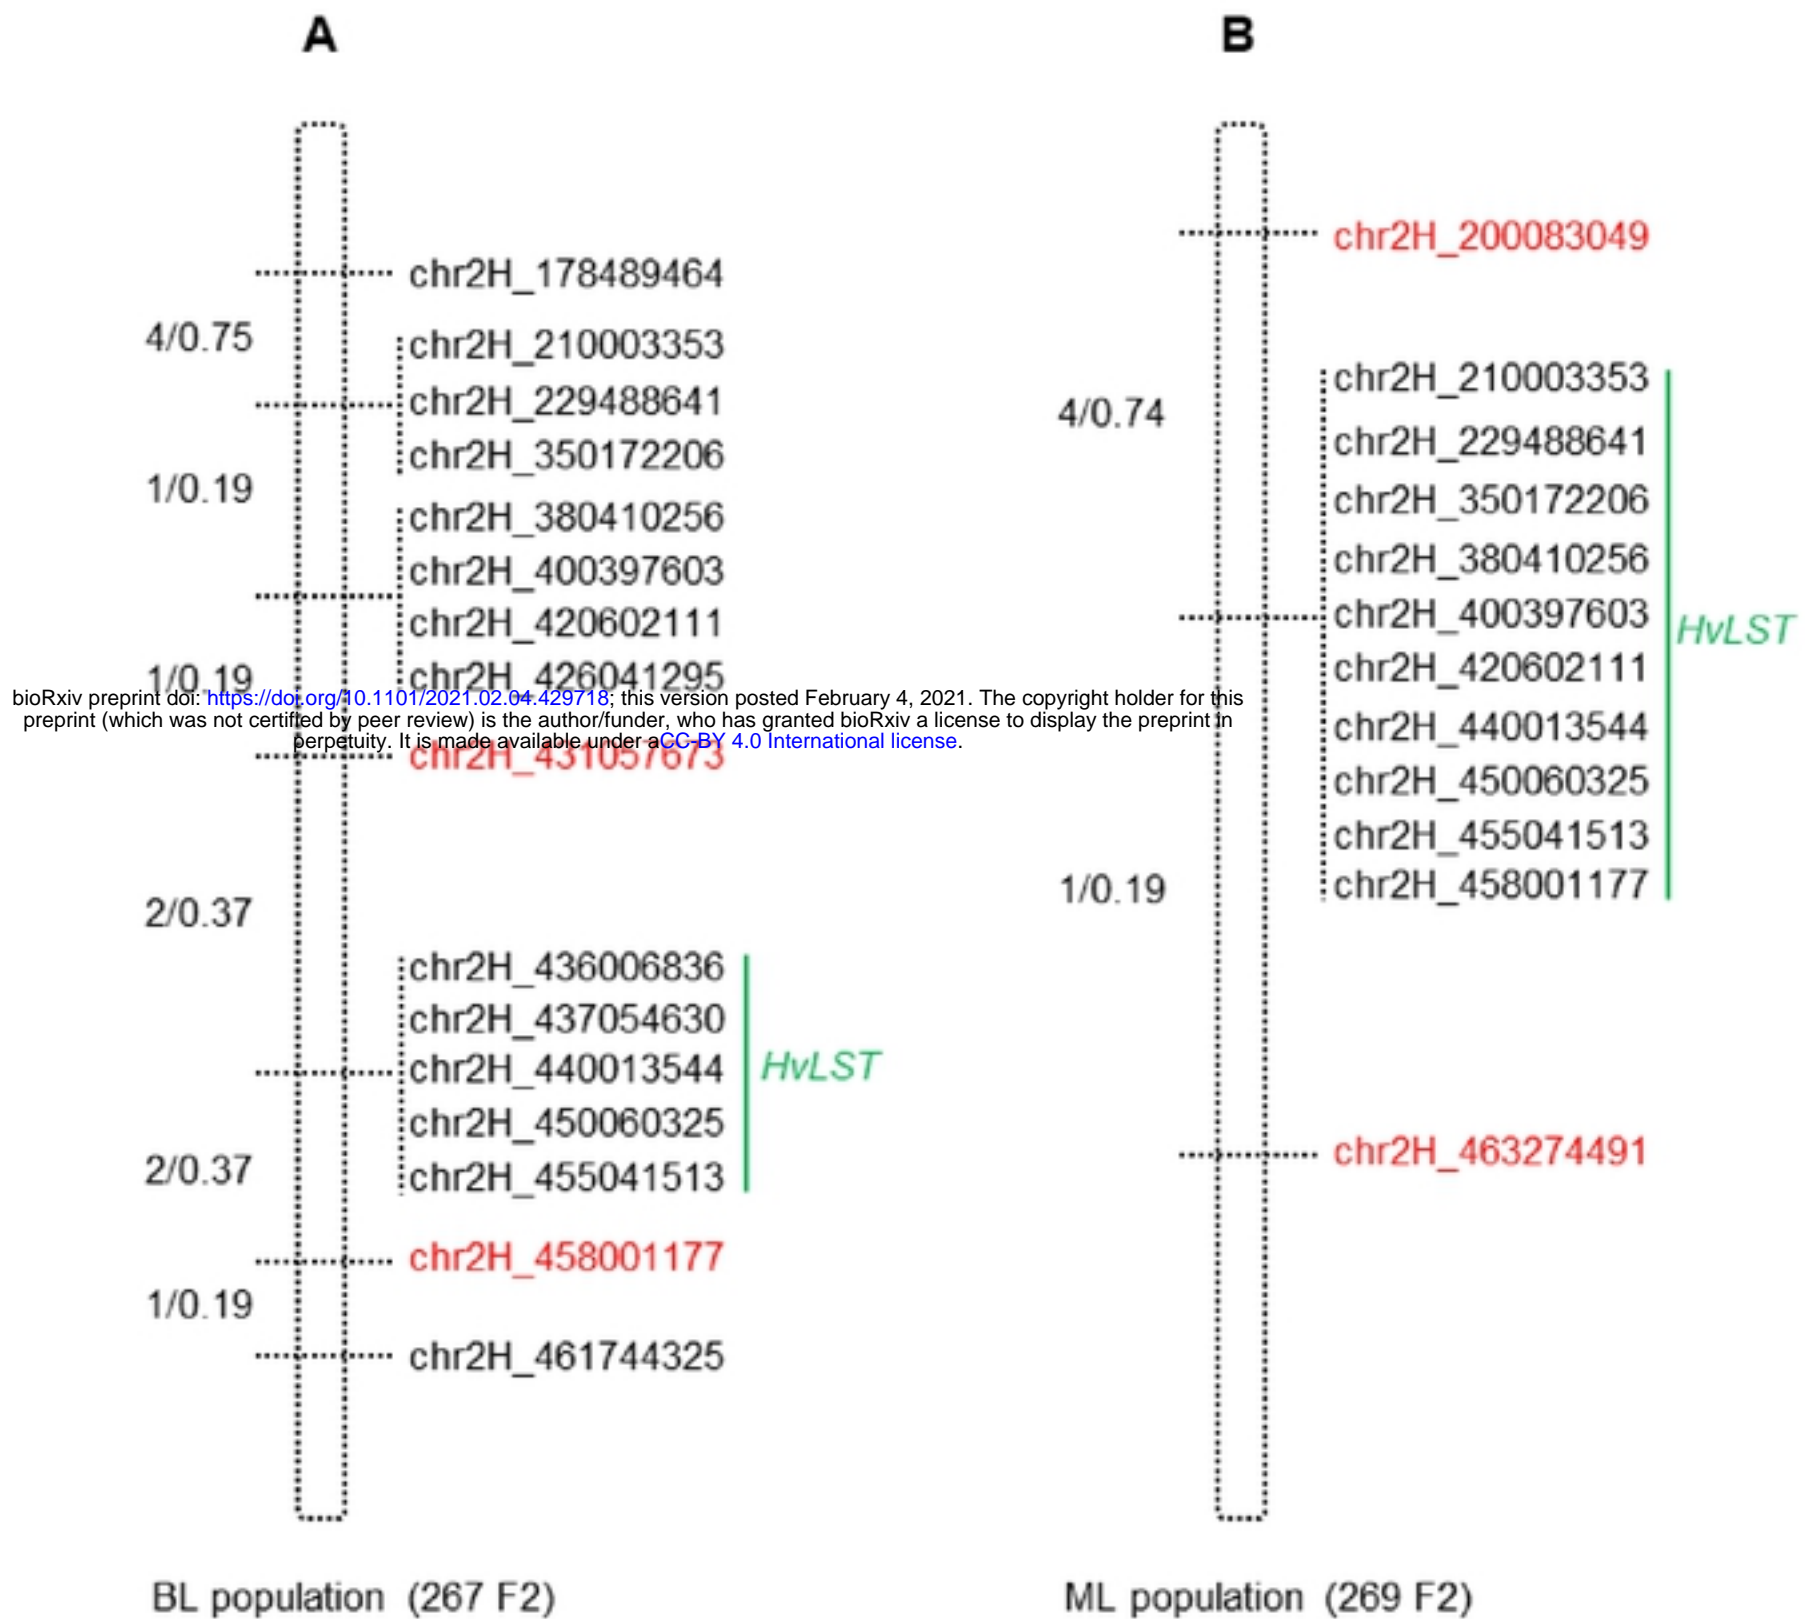

**Figure 4. Saturation mapping of the delineated *HvLST* genetic interval.**

(A) Marker saturation around the *HvLST* locus in BL population.

(B) Marker saturation around the *HvLST* locus in ML population. Recombination events and genetic distance (recombinants/cM) between the neighboring markers are shown on the left of each genetic map. Markers co-segregating with the gene *HvLST* are indicated by a vertical green line. Red font is highlighting the closest flanking markers.

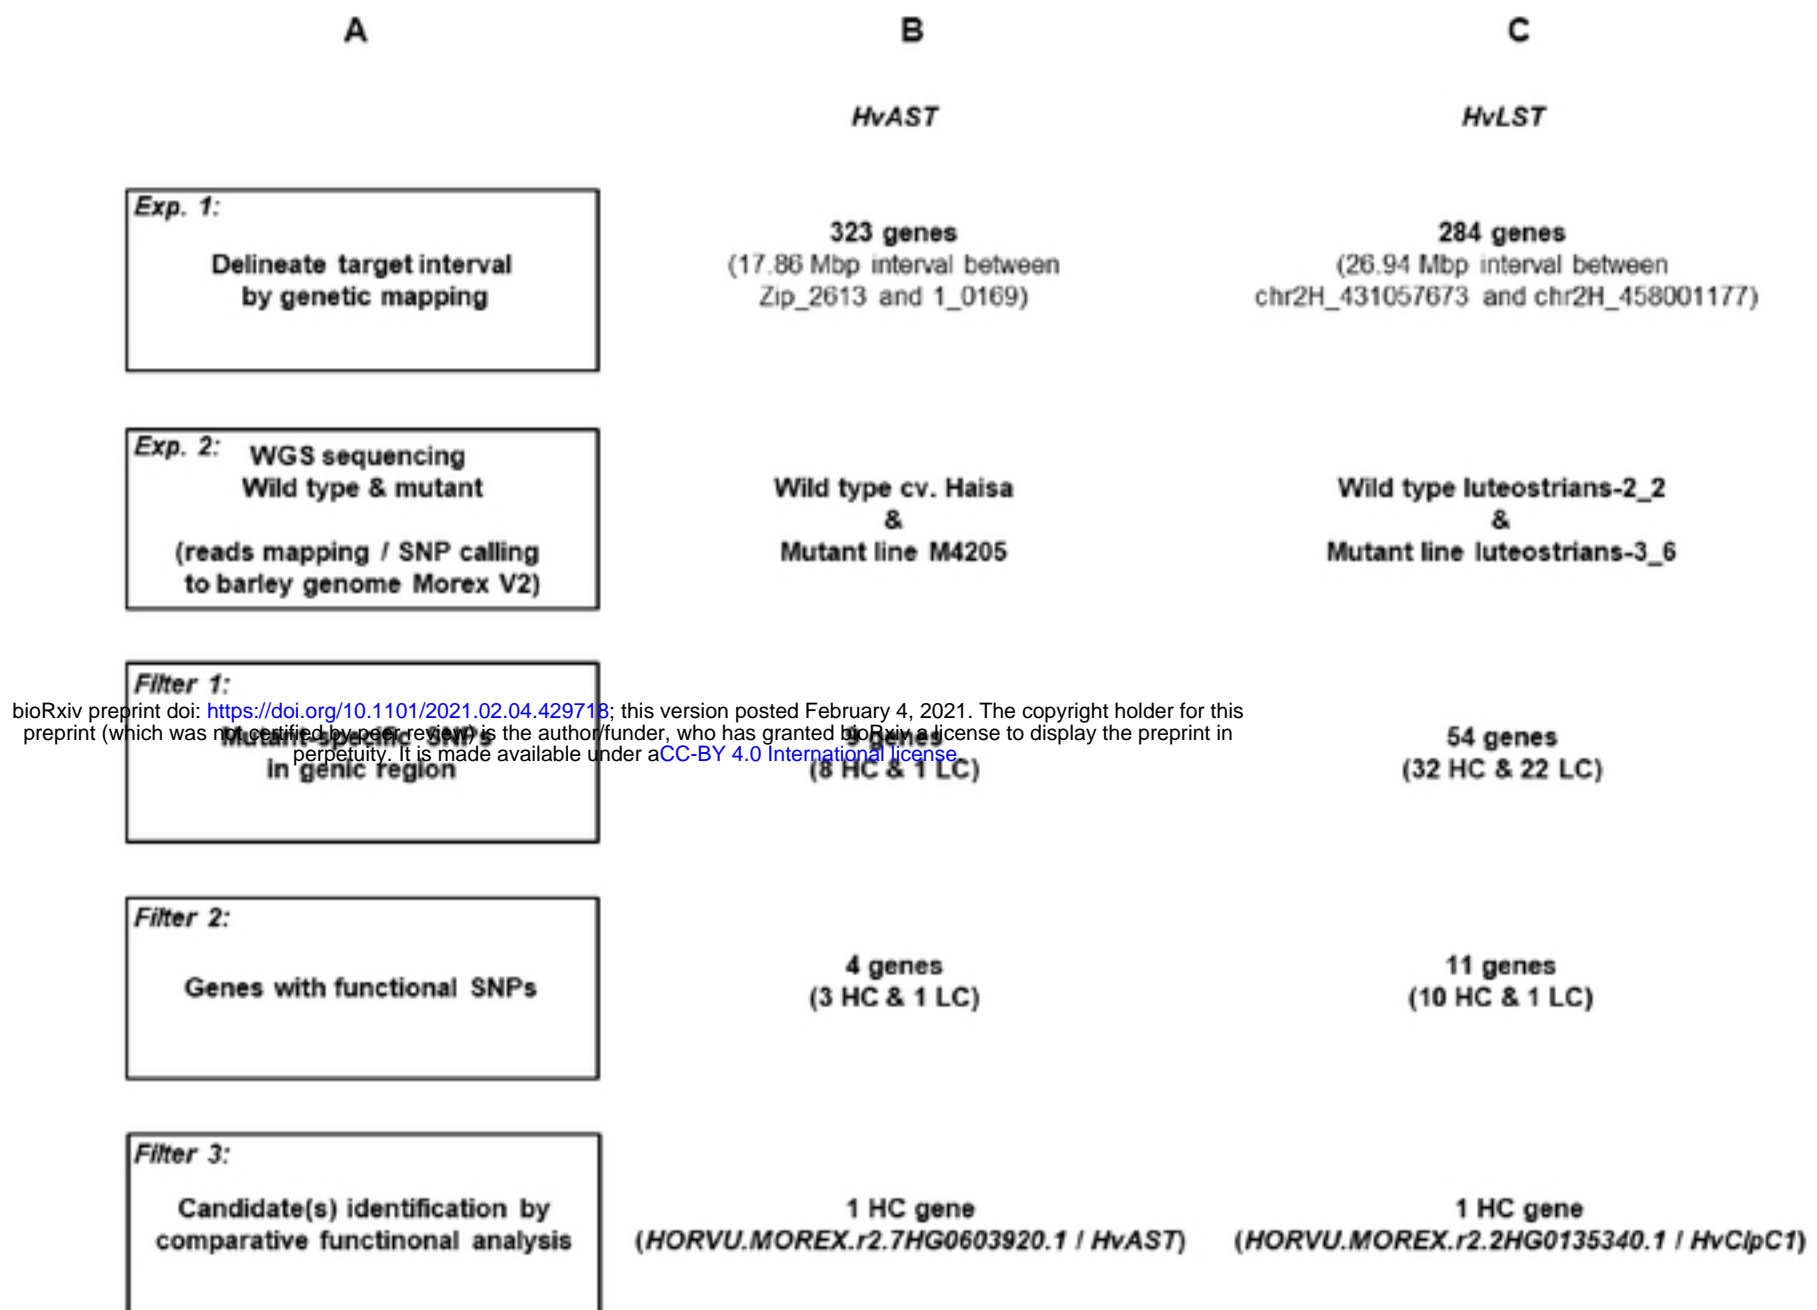

bioRxiv preprint doi: <https://doi.org/10.1101/2021.02.04.429718>; this version posted February 4, 2021. The copyright holder for this preprint (which was not certified by peer review) is the author/funder, who has granted bioRxiv a license to display the preprint in perpetuity. It is made available under aCC-BY 4.0 International license.

**Figure 5. Workflow of candidate gene identification in barley photosynthetic mutants exemplified for *HvAST* and *HvLST*.**

(A) The initial step of the strategy built on low-resolution genetic mapping. Whole genome re-sequencing data for the mutant and its corresponding wild type genotype was then generated for mapping and variation calling against the Morex v2 reference sequence (Monat et al., 2019).

(B) Candidate gene identification was exemplified on the basis of the previously cloned gene *albostrians* (*HvAST*). 323 genes were annotated for the physical interval of ~18 Mbp initially delimited by low-resolution genetic mapping. SNP variation was found in 9 genes, while only 4 genes carried non-synonymous or other deleterious mutations. A single candidate gene (the confirmed gene *HvAST*) could be delimited based on available functional annotation information indicating a role in plastid biology / photosynthesis.

(C) A similar strategy was applied to the cloning of *luteostrians*. 284 genes were annotated for the initial genetic interval. Eventually, a single candidate gene with predicted functional annotation for a role in plastid biology / photosynthesis and non-synonymous / deleterious mutation could be spotted. HC, high-confidence gene; LC, low-confidence genes. Criteria for classification of HC and LC refers to Mascher et al. (2017).

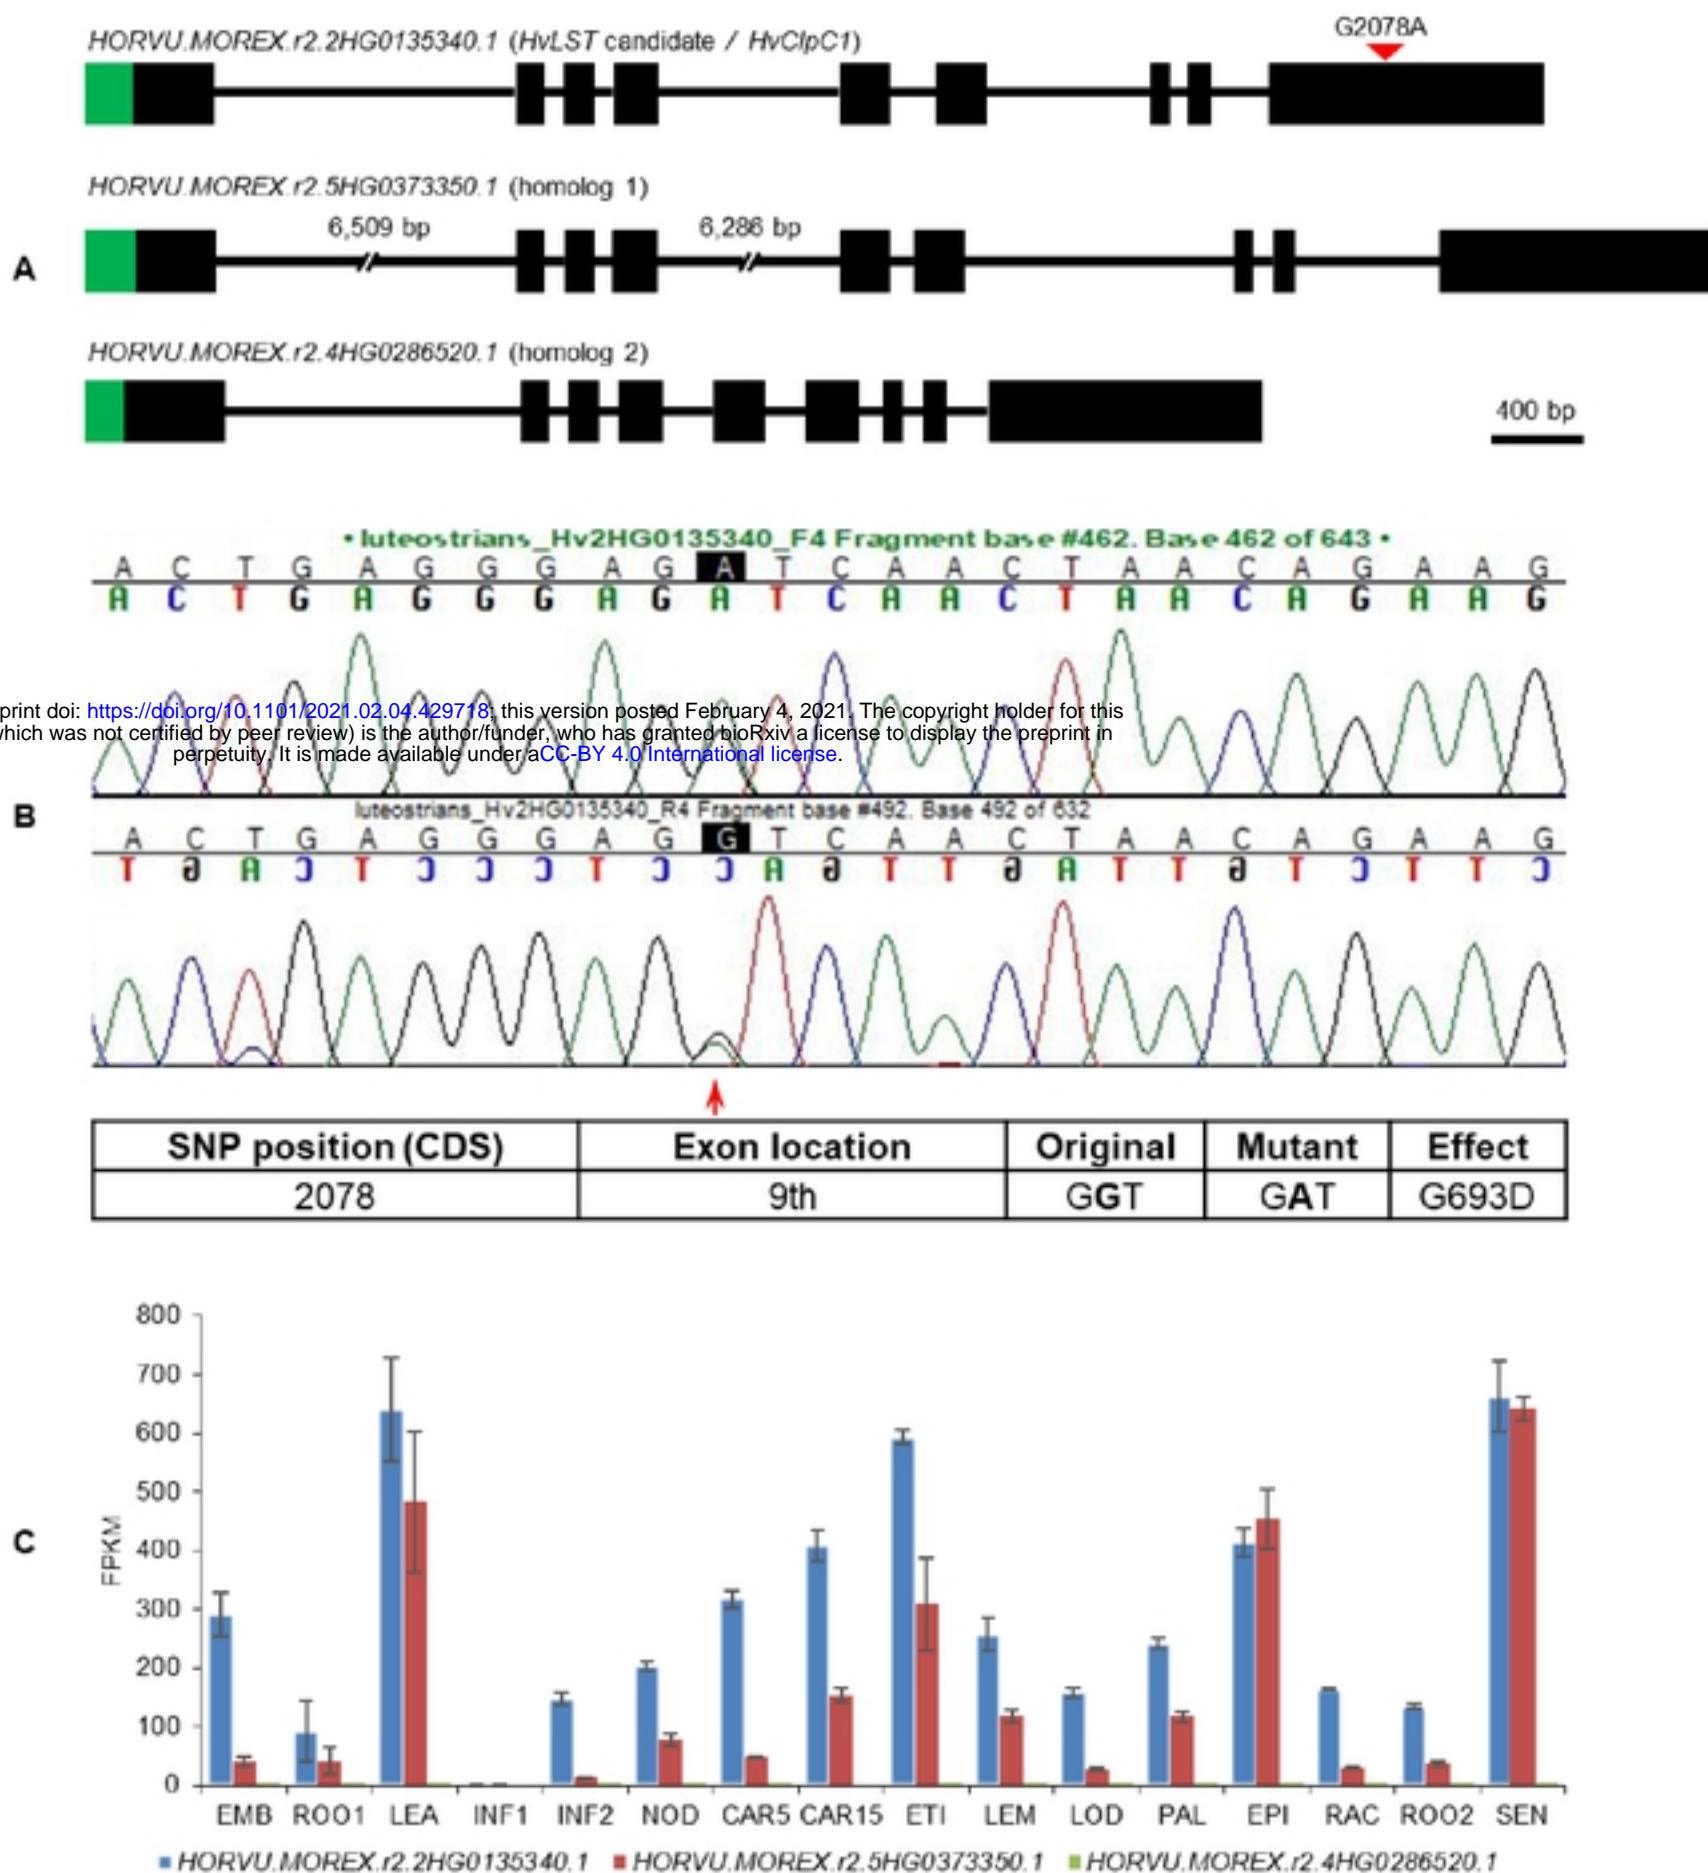

bioRxiv preprint doi: <https://doi.org/10.1101/2021.02.04.429718>; this version posted February 4, 2021. The copyright holder for this preprint (which was not certified by peer review) is the author/funder, who has granted bioRxiv a license to display the preprint in perpetuity. It is made available under aCC-BY 4.0 International license.

**Figure 6. Validation of the heterozygous SNP of *HvClpC1* by Sanger sequencing and expression profiles of *HvClpC1* and homologs.**

(A) Gene structure of *HvLST* candidate (*HvClpC1*) and its two closest homologs. Black boxes indicate exons and horizontal lines indicate introns. Green areas indicate chloroplast transit peptides as predicted by ChloroP (Emanuelsson et al., 1999). The first and second introns of homolog 1 are not drawn at scale as indicated by the interrupted lines; the actual length is shown above gaps, respectively. Red filled triangle indicates SNP position of *HvClpC1*.

(B) Chromatogram of Sanger sequencing. Red arrow indicates position of the heterozygous SNP of *HvClpC1* in the original mutant line luteostrians-1\_1. Details of the SNP are illustrated in the table below.

(C) Expression profiles of *HvClpC1* and its two closest homologs. The expression levels are given as fragments per kilobase of exon per million reads mapped (FPKM) across sixteen different tissues or developmental stages. The data was taken from Mascher et al. (2017). EMB, 4-day embryos; ROO1, roots from seedlings (10 cm shoot stage); LEA, shoots from

seedlings (10 cm shoot stage); INF1, young developing inflorescences (5 mm); INF2, developing inflorescences (1-1.5 cm); NOD, developing tillers, 3rd internode (42 DAP); CAR5, developing grain (5 DAP); CAR15, developing grain (15 DAP); ETI, etiolated seedling, dark condition (10 DAP); LEM, inflorescences, lemma (42 DAP); LOD, inflorescences, lodicule (42 DAP); PAL, dissected inflorescences, palea (42 DAP); EPI, epidermal strips (28 DAP); RAC, inflorescences, rachis (35 DAP); ROO2, roots (28 DAP); SEN, senescing leaves (56 DAP).

## References

Emanuelsson, O., Nielsen, H., and von Heijne, G. (1999). ChloroP, a neural network-based method for predicting chloroplast transit peptides and their cleavage sites. *Protein Sci.* **8**, 978-984.

Mascher, M., Gundlach, H., Himmelbach, A., Beier, S., Twardziok, S.O., Wicker, T., Radchuk, V., Dockter, C., Hedley, P.E., Russell, J., Bayer, M., Ramsay, L., Liu, H., Haberer, G., Zhang, X.Q., Zhang, Q., Barrero, R.A., Li, L., Taudien, S., Groth, M., Felder, M., Hastie, A., Simkova, H., Stankova, H., Vrana, J., Chan, S., Munoz-Amatriain, M., Ounit, R., Wanamaker, S., Bolser, D., Colmsee, C., Schmutzer, T., Aliyeva-Schnorr, L., Grasso, S., Tanskanen, J., Chailyan, A., Sampath, D., Heavens, D., Clissold, L., Cao, S., Chapman, B., Dai, F., Han, Y., Li, H., Li, X., Lin, C., McCooke, J.K., Tan, C., Wang, P., Wang, S., Yin, S., Zhou, G., Poland, J.A., Bellgard, M.I., Borisjuk, L., Houben, A., Dolezel, J., Ayling, S., Lonardi, S., Kersey, P., Langridge, P., Muehlbauer, G.J., Clark, M.D., Caccamo, M., Schulman, A.H., Mayer, K.F.X., Platzer, M., Giese, T.J., Scholz, U., Hansson, M., Zhang, G., Braumann, I., Spannagl, M., Li, C., Waugh, R., and Stein, N. (2017). A chromosome conformation capture ordered sequence of the barley genome. *Nature* **544**, 427-433.

Monat, C., Padmarasu, S., Lux, T., Wicker, T., Gundlach, H., Himmelbach, A., Ens, J., Li, C., Muehlbauer, G.J., Schulman, A.H., Waugh, R., Braumann, I., Pozniak, C., Scholz, U., Mayer, K.F.X., Spannagl, M., Stein, N., and Mascher, M. (2019). TRITEX: chromosome-scale sequence assembly of Triticeae genomes with open-source tools. *Genome Biol.* **20**, 284.
